# Supplementary material for: Long-term economic outcomes for interventions in early childhood: protocol for a systematic review
Source: PubMed Central journal article supplement — BMJ Open. 2020 Aug 11;10(8):e036647. doi: 10.1136/bmjopen-2019-036647 (PMC7418662; doi:10.1136/bmjopen-2019-036647), 2020-08-11
Supplement: bmjopen-2019-036647.draft_revisions.pdf [file bmjopen-2019-036647.draft_revisions.pdf]

# BMJ Open

BMJ Open is committed to open peer review. As part of this commitment we make the peer review history of every article we publish publicly available.

When an article is published we post the peer reviewers' comments and the authors' responses online. We also post the versions of the paper that were used during peer review. These are the versions that the peer review comments apply to.

The versions of the paper that follow are the versions that were submitted during the peer review process. They are not the versions of record or the final published versions. They should not be cited or distributed as the published version of this manuscript.

BMJ Open is an open access journal and the full, final, typeset and author-corrected version of record of the manuscript is available on our site with no access controls, subscription charges or pay-per-view fees (<http://bmjopen.bmj.com>).

If you have any questions on BMJ Open's open peer review process please email [info.bmjopen@bmj.com](mailto:info.bmjopen@bmj.com)

# BMJ Open

## Long-term economic return on investment for interventions in early childhood: Protocol for a systematic review

|                               |                                                                                                                                                                                                                                                                                                                                                                                                          |
|-------------------------------|----------------------------------------------------------------------------------------------------------------------------------------------------------------------------------------------------------------------------------------------------------------------------------------------------------------------------------------------------------------------------------------------------------|
| Journal:                      | <i>BMJ Open</i>                                                                                                                                                                                                                                                                                                                                                                                          |
| Manuscript ID                 | bmjopen-2019-036647                                                                                                                                                                                                                                                                                                                                                                                      |
| Article Type:                 | Protocol                                                                                                                                                                                                                                                                                                                                                                                                 |
| Date Submitted by the Author: | 24-Dec-2019                                                                                                                                                                                                                                                                                                                                                                                              |
| Complete List of Authors:     | Geelhoed, Elizabeth; Telethon Kids Institute<br>Mandzufas, Joeline; Telethon Kids Institute,<br>George, Phoebe; Telethon Kids Institute<br>Strahan, Ken; Telethon Kids Institute<br>Duffield, Alison; Telethon Kids Institute<br>Borland, Jeff; The University of Melbourne<br>Li, Ian; University of Western Australia, School of Population and Global Health<br>Cross, Donna; Telethon Kids Institute |
| Keywords:                     | HEALTH ECONOMICS, PUBLIC HEALTH, Community child health < PAEDIATRICS, Health economics < HEALTH SERVICES ADMINISTRATION & MANAGEMENT                                                                                                                                                                                                                                                                    |
|                               |                                                                                                                                                                                                                                                                                                                                                                                                          |

SCHOLARONE™  
Manuscripts

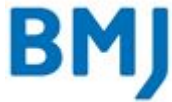

I, the Submitting Author has the right to grant and does grant on behalf of all authors of the Work (as defined in the below author licence), an exclusive licence and/or a non-exclusive licence for contributions from authors who are: i) UK Crown employees; ii) where BMJ has agreed a CC-BY licence shall apply, and/or iii) in accordance with the terms applicable for US Federal Government officers or employees acting as part of their official duties; on a worldwide, perpetual, irrevocable, royalty-free basis to BMJ Publishing Group Ltd ("BMJ") its licensees and where the relevant Journal is co-owned by BMJ to the co-owners of the Journal, to publish the Work in this journal and any other BMJ products and to exploit all rights, as set out in our [licence](#).

The Submitting Author accepts and understands that any supply made under these terms is made by BMJ to the Submitting Author unless you are acting as an employee on behalf of your employer or a postgraduate student of an affiliated institution which is paying any applicable article publishing charge ("APC") for Open Access articles. Where the Submitting Author wishes to make the Work available on an Open Access basis (and intends to pay the relevant APC), the terms of reuse of such Open Access shall be governed by a Creative Commons licence – details of these licences and which [Creative Commons](#) licence will apply to this Work are set out in our licence referred to above.

Other than as permitted in any relevant BMJ Author's Self Archiving Policies, I confirm this Work has not been accepted for publication elsewhere, is not being considered for publication elsewhere and does not duplicate material already published. I confirm all authors consent to publication of this Work and authorise the granting of this licence.

## Long-term economic return on investment for interventions in early childhood: Protocol for a systematic review

Geelhoed, E., Mandzufas, J., George, P., Strahan, K., Duffield, A., Borland, J., Li, I., Cross, D

### Authors

Elizabeth Geelhoed (1) : [liz.geelhoed@telethonkids.org.au](mailto:liz.geelhoed@telethonkids.org.au)  
Joelie Mandzufas (1) : [joelie.mandzufas@telethonkids.org.au](mailto:joelie.mandzufas@telethonkids.org.au)  
Phoebe George (1) : [phoebe.george@telethonkids.org.au](mailto:phoebe.george@telethonkids.org.au)  
Kenneth Strahan (1) : [ken@strahan-research.com](mailto:ken@strahan-research.com)  
Alison Duffield (1) : [Alison.duffield@telethonkids.org.au](mailto:Alison.duffield@telethonkids.org.au)  
Jeff Borland (2) : [jib@unimelb.edu.au](mailto:jib@unimelb.edu.au)  
Ian Li (3) : [ian.li@uwa.edu.au](mailto:ian.li@uwa.edu.au)  
Donna Cross (1) : [donna.cross@telethonkids.org.au](mailto:donna.cross@telethonkids.org.au)

### Affiliations

<sup>1</sup>Telethon Kids Institute, PO Box 855, West Perth WA 6872, Australia

<sup>2</sup>The University of Melbourne, 100 Grattan Street, Parkerville Victoria 3010, Australia

<sup>3</sup>The University of Western Australia, 35 Stirling Highway, Perth WA 6009, Australia

### Corresponding author:

Elizabeth Geelhoed

Telethon Kids Institute

Telethon Kids Institute, PO Box 855, West Perth WA 6872, Australia

[liz.geelhoed@telethonkids.org.au](mailto:liz.geelhoed@telethonkids.org.au)

Word count: 2207 words

## Abstract

### **Introduction:**

Investment in early childhood produces positive returns: for the child, the family and the community. These returns have been shown to be significant within certain parameters, but a systematic review of evidence across multiple sectors including health, education and social welfare will have the capacity to provide information across a broader scope. The review will take a societal approach, encompassing all relevant costs and benefits to enable the identification of the most beneficial investments in early childhood and highlight gaps in current research.

### **Methods and analysis:**

Economic evaluation studies which include both costs and outcomes of early childhood interventions and programs will be included. Outcomes may be valued in monetary units or quantified non-monetary units (e.g. quality adjusted life years, disability adjusted life years). Results will be expressed as a ratio according to the outcome; with monetary outcomes expressed as cost-benefit ratios or return on investment (ROI), and non-monetary outcomes expressed as cost per quality-adjusted life year (QALY) or disability-adjusted life year (DALY). The target population is children aged 0-5 years (from birth to school entry).

Databases for search will include MEDLINE, PsycINFO, EMBASE, National Health Service Economic Evaluation Database (NHS EED), Econ Lit, Paediatric Economic Database Evaluation (PEDE) and Education Resources Information Center (ERIC). Reference lists will be searched for further relevant articles. The review will involve five phases: defining the research question, identifying relevant studies, selecting studies, extracting and collating data, and summarising and reporting results.

### **Ethics and dissemination:**

1  
2  
3 The findings of this review will inform policy makers and practitioners in public health, education, social  
4 welfare and primary care settings. Exemption from ethics approval was granted by the University of Western  
5 Australia Human Ethics Office (RA/4/20/5677).  
6  
7  
8  
9

#### 10 **Systematic review registration:**

11  
12  
13 This protocol has been submitted for registration with PROSPERO, file number 145901 (currently being  
14 assessed for registration).  
15  
16  
17

## 18 **Article summary**

### 19 **Strengths and limitations of this study**

- 20 • Holistic approach to review evidence of early childhood investment
- 21 • Identification of gaps in the literature
- 22 • Internationally based

#### 23 **Limitations**

- 24 • Different methodological approaches according to discipline and/or sector
  - 25 • Contrasting priorities for investment according to income level of country
- 26  
27  
28  
29  
30  
31  
32  
33  
34  
35  
36  
37  
38  
39  
40  
41  
42  
43  
44  
45  
46  
47  
48  
49  
50  
51  
52  
53  
54  
55  
56  
57  
58  
59  
60

## Introduction

Evidence indicates that investment in early childhood generates positive returns, for the child, the family and the wider community [1-5]. This is particularly so for children who struggle to pursue their full potential, due to poor health [6-8], lack of opportunities to learn [1-5], and/or deprivation of care [9, 10]. While the return on investment in early childhood has been shown to be significant within certain parameters, to date there is limited evidence addressing investment across multiple sectors (including health, education and social welfare) [11].

Early childhood interventions benefit children in the short term through the development of resilience, improved cognitive skills, reduced school absenteeism and reduced risk of disease; and may generate positive long-term outcomes through better employment pathways [1, 2], improved health [3, 6-8] and reduced dependency on welfare (including social services, incarceration and juvenile justice) [12-14].

Ensuing benefits in adulthood include better opportunities for employment and higher income [2], reduced risk of teenage pregnancy and crime and improved health outcomes [1]. Investment in disadvantaged children also has the potential to reduce inequality [3, 5], and to improve national productivity and gross domestic product (GDP) [1, 2, 4]. Conversely the cost of failing to adequately support children has implications for the child and the community, and, through the social and economic implications of that failure, to the national economy [15].

Much of the research on successful early childhood interventions and programs supports the need to intervene prior to formal school entry. For instance, developmental neuroscience emphasises ages 0 to 5 years as the optimal time to intervene [3] based on the rate of change that occurs physically and mentally during this period. Interventions initiated between the ages of 0 and 3 years have been shown to yield the highest economic returns, particularly for children experiencing adversity [6]. Determining the optimal timing, duration and threshold of intensity of intervention is an important focus for this review.

1  
2  
3 While the benefit of early childhood investment is well-established per se, priorities for the best allocation of  
4 resources are less clear. Understanding the comparative 'value' of a program [5] is central to enabling policy  
5 choices. This 'value' can be expressed in terms of cost-effectiveness (the cost required to achieve a given  
6 outcome), as cost-benefit (the ratio of cost inputs to dollar benefits) or as Return on Investment (ROI), which  
7 compares net profit with cost inputs. Typically, health programs are valued according to costs per Quality  
8 Adjusted Life Year (QALY) or cost per Disability Adjusted Life Year (DALY) whereas in education, value is more  
9 typically presented in terms of cost-benefit or ROI.

10  
11  
12 Consistent with the World Health Organization (WHO) definition of health as "a state of complete physical,  
13 mental and social well-being and not merely the absence of disease or infirmity" [16], individual outcomes  
14 are specified broadly, encompassing a child's whole life potential. For example, optimal health for the young  
15 child includes the development of resilience and the opportunities to achieve throughout their life.

16  
17  
18 Aggregation of individual outcomes provides economic outcomes at a community, national, and global level.

19  
20  
21 A systematic review of the peer-reviewed literature across all sectors will synthesise the economic evidence  
22 on interventions directed toward infants and children (those aged 0 to 5 years), for legislators, practitioners  
23 and policy makers. Health, education and welfare spending on young children is increasingly resource  
24 constrained and must compete with other demands. A comprehensive and clear summary of the evidence  
25 base is a prerequisite for a rational and justifiable prioritization of the wide range of options for investment  
26 in early childhood.

27  
28  
29 The aim of this study is to systematically review economic evidence on population interventions targeted at  
30 children aged 0-5 years across multiple sectors including health, education and social welfare to compare  
31 relative return on investment.



## Methods and Analysis

### Eligibility criteria

The review will include economic evaluation studies in peer-reviewed journals containing both costs and non-monetary outcomes (including cost-minimisation, cost-utility, cost-effectiveness) or costs and outcomes valued in monetary terms (cost-benefit and other return on investment). The sectoral differences in approach to economic evaluations, for example the use of cost-benefit analysis in the education sector and cost effectiveness in health, will be transparently addressed. Given the potential variation in methodological approach, it may be necessary to present economic ratios specific to each sector or within sub-groups such as vulnerable and low socioeconomic groups.

Participants in reviewed studies will primarily be infants and children aged 0 to 5 years; but may also include alternative groups such as parents, where outcomes relate to children. Studies including broader population age groups will be considered where data relating to 0 to 5 year-olds can be separately extracted.

Interventions may have broad scope including vaccination, nutrition and health management; early childhood learning, access to early childhood programs and the organisation of early learning; and the impact of poverty, maternal employment and parental incarceration. Only 'public health' interventions, encompassing investments in health, education and social welfare to optimise the potential of the whole person [16] will be included. Acute care or diagnostic choices in tertiary care will not be included.

Experimental and quasi-experimental studies will be included. All interventions will be assessed against a control, although the comparator may be 'no intervention'. Additional components of quality will be considered within a set template and studies may be excluded if they do not meet the agreed criteria. Only studies that involve both an investment in early childhood and a measured benefit will be reviewed. Studies will be excluded if costs unrelated to outcomes for young children are the primary outcome measure or if outcomes are not included in the publication.

## Information sources

The following electronic databases will be searched: MEDLINE (Ovid), EMBASE (Ovid), PsycInfo (Ovid), National Health Service Economic Evaluation Database (NHS EED), Econ Lit, Paediatric Economic Database Evaluation (PEDE) and Education Resources Information Center (ERIC).

Reference lists of included studies will be hand searched to identify further papers. Authors of particularly germane studies may be contacted for additional pertinent material where considered necessary.

References cited in relevant systematic reviews will be searched for additional eligible studies.

## Search strategy

Indexing of the literature varies between the listed electronic databases, requiring tailored search specifications. For example, databases dedicated to predefined criteria, such as "paediatric", do not require inclusion of that criterion in the search.

The search strategy to be applied to the Ovid platform (MEDLINE, EMBASE, PsycInfo) will be used in a modified form for all other databases. For example, in Medline the search will combine exp Child, Preschool/, INFANT/, early childhood.mp and (preschool child\* or infant\* or prekindergarten or kinder\* or child\*).mp. This will be specified as: all infant (birth to 23 months) or newborn infant (birth to 1 month) or infant (1 to 23 months) or preschool child (2 to 5 years). Cost-Benefit Analysis/, exp Quality-Adjusted Life Years/, (return on invest\* or "cost and cost analysis" or economic evaluation or QALY or DALY or "quality adjusted life year\*" or ROI or cost benefit\*) will be combined.

The search in all databases will be limited to peer reviewed journals published since 2000; classified as journal article (ie no conference proceedings, supplements, or letters); and relating to human research.

## Study records

## Data management

Search results will be imported into Covidence [17] and automatically deduplicated. Additional duplicates will be manually identified and removed once full text comparison is undertaken.

## Selection process

The CoLab Economics Systematic Review Consultancy Group comprises internationally recognised professional staff, consultants, and senior economists. This group provided advice on the design of the study and will be involved in other facets of the data collection and analysis.

Two reviewers will independently examine the titles and abstracts retrieved through the search process to identify studies that do not meet the stated eligibility criteria. At this level any economic evaluation measuring cost effectiveness, cost-utility or return on investment from interventions affecting the immediate and/or lifetime health, education, labour or social welfare outcomes of infants and children, other than clinical treatment outcomes, will be included. Lack of consensus between reviewers on study inclusion will be resolved through discussion. Where necessary a third reviewer will be consulted. Full texts of the remaining potentially relevant records will be retrieved in order to proceed to independent evaluation by two reviewers.

## Data collection

An extraction template, using an adapted checklist, will be piloted and refined by staff, and circulated to the Consultancy group for further piloting, discussion and approval. Data items included in the extraction may be modified following piloting. At least two independent reviewers will extract data from the full text of selected studies. Extracted data will be compared and conflicts between the reviewers discussed and resolved.

## Data items

The characteristics of included studies will be described based on the following:

- I. General categorising information (sector information, category, condition, intervention, study question)
- II. Country and income level (using World Bank classifications) [18]
- III. Population characteristics and reason for selection (age group, stratification, target criteria, number of participants)
- IV. Perspective of the economic evaluation (societal, government, etc.)
- V. Time horizon
- VI. Economic study type and outcome ratio
- VII. Comparator(s) or base case and justification for comparator
- VIII. Costing approach (currency, index year for costs, standardisation methods, cost components, cost sources, discount rate)
- IX. Outcomes (measure of benefit in evaluation, discount rate applied in outcomes)
- X. Sensitivity analyses (parameters, methods and results)
- XI. Credibility and conflicts of interest (eg funder)
- XII. Modelling (type, structure, assumptions, sources, cycle length and validation)
- XIII. Feasibility/necessity to contact study authors to obtain missing information
- XIV. Quality (subjective)
  - a. Research methods (PICO)
  - b. Risk of bias – selection, performance, detection, attrition, reporting

- c. Imprecision - confidence intervals, sample size
- d. Inconsistency
- e. Publication bias

At the full text retrieval stage reviewers will examine the economic methods used, the useability of studies containing partially age relevant data and the significance of studies that require modelling inputs.

### Risk of bias in individual studies

The quality of the selected studies will be transparently reported based on the economic evaluation methods used, validity of assumptions and possible inherent biases. Two independent reviewers will assess the certainty of evidence considering risk of bias, imprecision, inconsistency, indirectness and publication bias. Five sources of bias in reported outcomes will be assessed: selection, performance, detection, attrition and reporting. Study authors who are contactable may be requested to provide pertinent and available missing data.

For each included study, both reviewers will assess the risk of bias and assign ratings of low, high or unclear risk of bias. Disagreement will be resolved via discussion between the two reviewers until they reach consensus or through referral to an independent third reviewer. Final decisions will be recorded in a 'Risk of bias' table with a rationale for each decision.

### Data

### Synthesis

Results will be reported consistent with the PRISMA 2009 checklist.

In consideration of differing economic evaluation methodologies across sectors, a narrative synthesis of data will be undertaken. Narrative format 'Summary of Findings' (SoF) tables will present the key results of the

1  
2  
3 review, including ranking of the certainty of the evidence upon which these results are based. Tables will be  
4  
5 developed according to the outcome variable, or the means of reporting returns on investment. Information  
6  
7 on population, intervention, comparison, setting and certainty of evidence will also be reported.  
8  
9

10 Comparisons will be made within sector (eg health sector using QALYs) but also across sectors, requiring  
11  
12 conversion to a common monetary unit. For the purposes of comparison, QALYs will be converted to Net  
13  
14 Benefit, to monetise outcomes. This requires the assumption of a 'willingness to pay' threshold to convert  
15  
16 QALYs to a common monetary unit.  
17  
18

### 19 20 Patient and public involvement

21  
22 This research was done without patient involvement. Patients were not invited to comment on the study  
23  
24 design and were not consulted to develop patient relevant outcomes or interpret the results. Patients were  
25  
26 not invited to contribute to the writing or editing of this document for readability or accuracy.  
27  
28  
29  
30  
31

## 32 Discussion

33  
34 This systematic review will be the first to consider cross-sector economic evaluation of investment in early  
35  
36 childhood. Whilst this presents some methodological challenges, the results will provide invaluable  
37  
38 information to assist ranking whole-of-government priorities and forming policy recommendations and  
39  
40 identify gaps in current literature. This project demonstrates a global perspective, with national policy  
41  
42 implications.  
43  
44  
45

46 The lack of consistent outcome measures between important sectors represents a potential limitation of the  
47  
48 review. For example, the conversion of outcomes to monetary units is contentious because of the  
49  
50 assumptions required. Further benefits of early intervention may be difficult to quantify because they are  
51  
52 intangible (e.g. resilience or self-belief) or because of extrapolation methods of predicting far into the future  
53  
54 (e.g. adult employment). Furthermore, while the cost effectiveness and ROI of outcomes in the health, social  
55  
56 welfare and education sectors can be measured or estimated, impacts on inequality, intergenerational  
57  
58  
59  
60

1  
2  
3  
4  
5  
6  
7  
8  
9  
10  
11  
12  
13  
14  
15  
16  
17  
18  
19  
20  
21  
22  
23  
24  
25  
26  
27  
28  
29  
30  
31  
32  
33  
34  
35  
36  
37  
38  
39  
40  
41  
42  
43  
44  
45  
46  
47  
48  
49  
50  
51  
52  
53  
54  
55  
56  
57  
58  
59  
60

outcomes and benefits at a societal level may be less easily quantified. Such limitations will be addressed transparently and as subgroups where necessary.

Summary evidence will provide policy makers with cross-sectoral information relevant to strategic decision-making for early childhood investment.

For peer review only

## References

1. Cunha F and J. Heckman, *The technology of skill formation*. American Economic Review, 2007. **97**: p. 31-47.
2. Rolnick, A. and R. Grunewald, *Early childhood development: Economic development with a high public return. Technical Report*. 2003.
3. Nores, M. and W.S. Barnett, *Benefits of early childhood interventions across the world: (Under) Investing in the very young*. . Economics of Education Review, 2010. **29**(2): p. 271-82.
4. Karoly, L., *The economic returns to early childhood education*. The Future of Children, 2016. **26**(2): p. 37-55.
5. Karoly, L., R. Kilburn, and J. Cannon, *Early childhood interventions proven results, future promise*. 2005, RAND Corporation,.
6. Doyle, O., et al., *Investing in early human development: Timing and economic efficiency*. Economics and Human Biology, 2009. **7**(1): p. 1-6.
7. Campbell, F., et al., *Early childhood investments substantially boost adult health*. Science, 2014. **343**(6178): p. 1478-85.
8. Hahn, R., et al., *Early childhood education to promote health equity: A community guide systematic review*. Journal of Public Health Management and Practice, 2016. **22**(5): p. E1-E8.
9. Doyle, O., et al., *Early skill formation and the efficiency of parental investment: A randomized controlled trial of home visiting*. . Labour Economics, 2017. **45**: p. 40-58.
10. Duncan, K., S. Macgillivray, and M. Renfrew, *Costs and savings of parenting interventions: Results of a systematic review*. Child: Care, Health and Development, 2017: p. 1-15.
11. Atinc, T. and E. Gustaffson-Wright, *Early childhood development: the promise, the problem, and the path forward*. 2013, Center for Universal Education.
12. Piquero, A.R., et al., *Effects of early family/parent training programs on antisocial behavior and delinquency*. Journal of Experimental Criminology, 2009. **5**(2): p. 83-120.
13. Reynolds, A.J., et al., *Processes of Early Childhood Interventions to Adult Well-Being*. Child Development, 2017. **88**(2): p. 378-387.
14. Lee, S., S. Aos, and M. Miller, *Evidence-based programs to prevent children from entering and remaining in the child welfare system: Benefits and costs for Washington*. 2008, Washington State Institute for Public Policy: Olympia.
15. Teager, W., S. Fox, and N. Stafford, *How Australia can invest early and return more: A new look at the \$15b cost and opportunity*. 2019, Early Intervention Foundation, The Front Project and CoLab at the Telethon Kids Institute,: Australia.
16. World Health Organisation, *Constitution of the World Health Organization – Basic Documents, Forty-fifth edition, Supplement 2006*, WHO.
17. *Covidence systematic review software*. Veritas Health Innovation: Melbourne, Australia.
18. World Bank. *New country classifications by income level: 2018-2019*. 2019; Available from: <https://blogs.worldbank.org/opendata/new-country-classifications-income-level-2018-2019>.



## Authors' contributions

Elizabeth Geelhoed led the protocol drafting and is the guarantor of the review. Other authors contributed to reviews of further drafts and study methodology discussions.

## Funding

This work was supported by CoLab - Collaborate for Kids, a partnership between the Telethon Kids Institute and the Minderoo Foundation, made possible with funding from the Minderoo Foundation. Staff and external consultants are contracted by CoLab.

The funders had no input to the design of the study or development of the protocol.

## Competing interests

None declared.

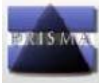

# PRISMA 2009 Checklist

| Section/topic                      | #  | Checklist item                                                                                                                                                                                                                                                                                              | Reported on page # |
|------------------------------------|----|-------------------------------------------------------------------------------------------------------------------------------------------------------------------------------------------------------------------------------------------------------------------------------------------------------------|--------------------|
| <b>TITLE</b>                       |    |                                                                                                                                                                                                                                                                                                             |                    |
| Title                              | 1  | Identify the report as a systematic review, meta-analysis, or both.                                                                                                                                                                                                                                         | 5                  |
| <b>ABSTRACT</b>                    |    |                                                                                                                                                                                                                                                                                                             |                    |
| Structured summary                 | 2  | Provide a structured summary including, as applicable: background; objectives; data sources; study eligibility criteria, participants, and interventions; study appraisal and synthesis methods; results; limitations; conclusions and implications of key findings; systematic review registration number. | 2                  |
| <b>INTRODUCTION</b>                |    |                                                                                                                                                                                                                                                                                                             |                    |
| Rationale                          | 3  | Describe the rationale for the review in the context of what is already known.                                                                                                                                                                                                                              | 4                  |
| Objectives                         | 4  | Provide an explicit statement of questions being addressed with reference to participants, interventions, comparisons, outcomes, and study design (PICOS).                                                                                                                                                  | 5                  |
| <b>METHODS</b>                     |    |                                                                                                                                                                                                                                                                                                             |                    |
| Protocol and registration          | 5  | Indicate if a review protocol exists, if and where it can be accessed (e.g., Web address), and, if available, provide registration information including registration number.                                                                                                                               | 2                  |
| Eligibility criteria               | 6  | Specify study characteristics (e.g., PICOS, length of follow-up) and report characteristics (e.g., years considered, language, publication status) used as criteria for eligibility, giving rationale.                                                                                                      | 7                  |
| Information sources                | 7  | Describe all information sources (e.g., databases with dates of coverage, contact with study authors to identify additional studies) in the search and date last searched.                                                                                                                                  | 7                  |
| Search                             | 8  | Present full electronic search strategy for at least one database, including any limits used, such that it could be repeated.                                                                                                                                                                               | 7                  |
| Study selection                    | 9  | State the process for selecting studies (i.e., screening, eligibility, included in systematic review, and, if applicable, included in the meta-analysis).                                                                                                                                                   | 8                  |
| Data collection process            | 10 | Describe method of data extraction from reports (e.g., piloted forms, independently, in duplicate) and any processes for obtaining and confirming data from investigators.                                                                                                                                  | 8                  |
| Data items                         | 11 | List and define all variables for which data were sought (e.g., PICOS, funding sources) and any assumptions and simplifications made.                                                                                                                                                                       | 8                  |
| Risk of bias in individual studies | 12 | Describe methods used for assessing risk of bias of individual studies (including specification of whether this was done at the study or outcome level), and how this information is to be used in any data synthesis.                                                                                      | 10                 |
| Summary measures                   | 13 | State the principal summary measures (e.g., risk ratio, difference in means).                                                                                                                                                                                                                               | 6                  |
| Synthesis of results               | 14 | Describe the methods of handling data and combining results of studies, if done, including measures of consistency (e.g., $I^2$ ) for each meta-analysis.                                                                                                                                                   | NA                 |

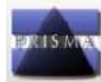

# PRISMA 2009 Checklist

Page 1 of 2

| Section/topic                 | #  | Checklist item                                                                                                                                                                                           | Reported on page # |
|-------------------------------|----|----------------------------------------------------------------------------------------------------------------------------------------------------------------------------------------------------------|--------------------|
| Risk of bias across studies   | 15 | Specify any assessment of risk of bias that may affect the cumulative evidence (e.g., publication bias, selective reporting within studies).                                                             | NA                 |
| Additional analyses           | 16 | Describe methods of additional analyses (e.g., sensitivity or subgroup analyses, meta-regression), if done, indicating which were pre-specified.                                                         | NA                 |
| <b>RESULTS</b>                |    |                                                                                                                                                                                                          |                    |
| Study selection               | 17 | Give numbers of studies screened, assessed for eligibility, and included in the review, with reasons for exclusions at each stage, ideally with a flow diagram.                                          | NA                 |
| Study characteristics         | 18 | For each study, present characteristics for which data were extracted (e.g., study size, PICOS, follow-up period) and provide the citations.                                                             | NA                 |
| Risk of bias within studies   | 19 | Present data on risk of bias of each study and, if available, any outcome level assessment (see item 12).                                                                                                | NA                 |
| Results of individual studies | 20 | For all outcomes considered (benefits or harms), present, for each study: (a) simple summary data for each intervention group (b) effect estimates and confidence intervals, ideally with a forest plot. | NA                 |
| Synthesis of results          | 21 | Present the main results of the review. If meta-analyses are done, include for each, confidence intervals and measures of consistency                                                                    | NA                 |
| Risk of bias across studies   | 22 | Present results of any assessment of risk of bias across studies (see Item 15).                                                                                                                          | NA                 |
| Additional analysis           | 23 | Give results of additional analyses, if done (e.g., sensitivity or subgroup analyses, meta-regression [see Item 16]).                                                                                    | NA                 |
| <b>DISCUSSION</b>             |    |                                                                                                                                                                                                          |                    |
| Summary of evidence           | 24 | Summarize the main findings including the strength of evidence for each main outcome; consider their relevance to key groups (e.g., healthcare providers, users, and policy makers).                     | NA                 |
| Limitations                   | 25 | Discuss limitations at study and outcome level (e.g., risk of bias), and at review-level (e.g., incomplete retrieval of identified research, reporting bias).                                            | NA                 |
| Conclusions                   | 26 | Provide a general interpretation of the results in the context of other evidence, and implications for future research.                                                                                  | NA                 |
| <b>FUNDING</b>                |    |                                                                                                                                                                                                          |                    |
| Funding                       | 27 | Describe sources of funding for the systematic review and other support (e.g., supply of data); role of funders for the systematic review.                                                               | 13                 |

41

42 From: Moher D, Liberati A, Tetzlaff J, Altman DG, The PRISMA Group (2009). Preferred Reporting Items for Systematic Reviews and Meta-Analyses: The PRISMA Statement. PLoS Med 6(7): e1000097.  
 43 doi:10.1371/journal.pmed1000097

43

44

For more information, visit: [www.prisma-statement.org](http://www.prisma-statement.org).

45

For peer review only - <http://bmjopen.bmj.com/site/about/guidelines.xhtml>

46

47

# BMJ Open

## Long-term economic return on investment for interventions in early childhood: Protocol for a systematic review

|                                 |                                                                                                                                                                                                                                                                                                                                                        |
|---------------------------------|--------------------------------------------------------------------------------------------------------------------------------------------------------------------------------------------------------------------------------------------------------------------------------------------------------------------------------------------------------|
| Journal:                        | <i>BMJ Open</i>                                                                                                                                                                                                                                                                                                                                        |
| Manuscript ID                   | bmjopen-2019-036647.R1                                                                                                                                                                                                                                                                                                                                 |
| Article Type:                   | Protocol                                                                                                                                                                                                                                                                                                                                               |
| Date Submitted by the Author:   | 16-Mar-2020                                                                                                                                                                                                                                                                                                                                            |
| Complete List of Authors:       | Geelhoed, Elizabeth; Telethon Kids Institute<br>Mandzufas, Joelie; Telethon Kids Institute, George, Phoebe; Telethon Kids Institute<br>Strahan, Ken; Telethon Kids Institute<br>Duffield, Alison; Telethon Kids Institute<br>Li, Ian; University of Western Australia, School of Population and Global Health<br>Cross, Donna; Telethon Kids Institute |
| <b>Primary Subject Heading</b>: | Public health                                                                                                                                                                                                                                                                                                                                          |
| Secondary Subject Heading:      | Health economics, Paediatrics                                                                                                                                                                                                                                                                                                                          |
| Keywords:                       | HEALTH ECONOMICS, PUBLIC HEALTH, Community child health < PAEDIATRICS, Health economics < HEALTH SERVICES ADMINISTRATION & MANAGEMENT                                                                                                                                                                                                                  |
|                                 |                                                                                                                                                                                                                                                                                                                                                        |

SCHOLARONE™  
Manuscripts



I, the Submitting Author has the right to grant and does grant on behalf of all authors of the Work (as defined in the below author licence), an exclusive licence and/or a non-exclusive licence for contributions from authors who are: i) UK Crown employees; ii) where BMJ has agreed a CC-BY licence shall apply, and/or iii) in accordance with the terms applicable for US Federal Government officers or employees acting as part of their official duties; on a worldwide, perpetual, irrevocable, royalty-free basis to BMJ Publishing Group Ltd ("BMJ") its licensees and where the relevant Journal is co-owned by BMJ to the co-owners of the Journal, to publish the Work in this journal and any other BMJ products and to exploit all rights, as set out in our [licence](#).

The Submitting Author accepts and understands that any supply made under these terms is made by BMJ to the Submitting Author unless you are acting as an employee on behalf of your employer or a postgraduate student of an affiliated institution which is paying any applicable article publishing charge ("APC") for Open Access articles. Where the Submitting Author wishes to make the Work available on an Open Access basis (and intends to pay the relevant APC), the terms of reuse of such Open Access shall be governed by a Creative Commons licence – details of these licences and which [Creative Commons](#) licence will apply to this Work are set out in our licence referred to above.

Other than as permitted in any relevant BMJ Author's Self Archiving Policies, I confirm this Work has not been accepted for publication elsewhere, is not being considered for publication elsewhere and does not duplicate material already published. I confirm all authors consent to publication of this Work and authorise the granting of this licence.

# Long-term economic return on investment for interventions in early childhood: Protocol for a systematic review

Geelhoed, E., Mandzufas, J., George, P., Strahan, K., Duffield, A., Li, I., Cross, D

## Authors

Elizabeth Geelhoed (1) : [liz.geelhoed@telethonkids.org.au](mailto:liz.geelhoed@telethonkids.org.au)  
Joelie Mandzufas (1) : [joelie.mandzufas@telethonkids.org.au](mailto:joelie.mandzufas@telethonkids.org.au)  
Phoebe George (1) : [phoebe.george@telethonkids.org.au](mailto:phoebe.george@telethonkids.org.au)  
Kenneth Strahan (1) : [ken@strahan-research.com](mailto:ken@strahan-research.com)  
Alison Duffield (1) : [Alison.duffield@telethonkids.org.au](mailto:Alison.duffield@telethonkids.org.au)  
Ian Li (2) : [ian.li@uwa.edu.au](mailto:ian.li@uwa.edu.au)  
Donna Cross (1) : [donna.cross@telethonkids.org.au](mailto:donna.cross@telethonkids.org.au)

## Affiliations

<sup>1</sup>Telethon Kids Institute, PO Box 855, West Perth WA 6872, Australia

<sup>2</sup>The University of Western Australia, 35 Stirling Highway, Perth WA 6009, Australia

## Corresponding author:

Elizabeth Geelhoed

Telethon Kids Institute

Telethon Kids Institute, PO Box 855, West Perth WA 6872, Australia

[liz.geelhoed@telethonkids.org.au](mailto:liz.geelhoed@telethonkids.org.au)

Word count: 2099 words

## Abstract

### **Introduction:**

Investment in early childhood produces positive returns: for the child, the family and the community.

Benefits have been shown to be significant within certain parameters, but a systematic review of the

economic evidence across multiple sectors including health, education and social welfare will have the

capacity to inform policy relative to the full range of social determinants. This review will take a broad

approach, encompassing a range of costs and benefits to enable the identification of the most beneficial

investments in early childhood and to highlight gaps in current research.

### **Methods and analysis:**

Economic evaluations which incorporate both costs and long-term outcomes of early childhood

interventions and programs will be included. Outcomes may be valued in monetary units or quantified non-

monetary units (e.g. quality adjusted life years, disability adjusted life years). Results will be expressed as a

ratio according to the outcome; with monetary outcomes expressed as cost-benefit ratios or return on

investment (ROI), and non-monetary outcomes expressed as cost per quality-adjusted life year (QALY) or

disability-adjusted life year (DALY). The target population is children aged 0-5 years (from birth to school

entry).

Databases for search will include MEDLINE, PsycINFO, EMBASE, National Health Service Economic Evaluation

Database (NHS EED), Econ Lit, Paediatric Economic Database Evaluation (PEDE) and Education Resources

Information Center (ERIC). Reference lists will be searched for further relevant articles. The review will

involve five phases: defining the research question, identifying relevant studies, selecting studies, extracting

and collating data, and summarising and reporting results.

### **Ethics and dissemination:**

1  
2  
3 The findings of this review will inform policy makers and practitioners in public health, education, social  
4 welfare and primary care settings. Exemption from ethics approval was granted by the University of Western  
5 Australia Human Ethics Office (RA/4/20/5677).  
6  
7  
8  
9

#### 10 **Systematic review registration:**

11  
12  
13 This protocol has been registered with PROSPERO: Registration number CRD42020145901.  
14  
15

#### 16 **Article summary**

##### 17 **Strengths and limitations of this study**

- 18 • Holistic approach to review evidence of early childhood investment
- 19 • Identification of gaps in the literature
- 20 • Internationally based

##### 21 Limitations

- 22 • Different methodological approaches according to discipline and/or sector
- 23 • Contrasting priorities for investment according to income level of country



## Introduction

Evidence indicates that investment in early childhood generates positive returns, for the child, the family and the wider community [1-5]. Benefits to children in the short term include the development of resilience, improved cognitive skills, reduced school absenteeism and reduced risk of disease. Longer term outcomes include better employment pathways [1, 2], improved health [3, 6-8] reduced dependency on welfare (including social services, incarceration and juvenile justice) [9-11] and reduction in inequality [3, 5]. This is particularly so for children who struggle to pursue their full potential, due to poor health [6-8], lack of opportunities to learn [1-5], and/or deprivation of care [12, 13]. Ultimately these benefits have implications for improving national productivity and gross domestic product (GDP) [1, 2, 5]. Conversely the cost of failing to adequately support children has implications for the child and the community, and, through the social and economic implications of that failure, to the national economy [14]. While the benefits of investment in early childhood have been shown to be significant within certain parameters, to date there is limited evidence addressing investment across multiple sectors (including health, education and social welfare) [15].

Much of the research on successful early childhood interventions and programs supports the need to intervene prior to formal school entry. For instance, developmental neuroscience emphasises ages 0 to 5 years as the optimal time to intervene [3] based on the rate of change that occurs physically and mentally during this period. Interventions initiated between the ages of 0 and 3 years have been shown to yield the highest economic returns, particularly for children experiencing adversity [6].

While the benefit of early childhood investment is well-established per se, priorities for the best allocation of resources are less clear. Understanding the comparative 'value' of a program [5] is central to enabling policy choices. This 'value' can be expressed in terms of cost-effectiveness (the cost required to achieve a given outcome), as cost-benefit (the ratio of cost inputs to dollar benefits) or as Return on Investment (ROI), which compares net profit with cost inputs. Typically, health programs are valued according to cost per Quality

1  
2  
3 Adjusted Life Year (QALY) or cost per Disability Adjusted Life Year (DALY) whereas in education, value is more  
4  
5 typically presented in terms of cost-benefit or ROI.  
6  
7

8 Consistent with the World Health Organization (WHO) definition of health as "a state of complete physical,  
9  
10 mental and social well-being and not merely the absence of disease or infirmity" [16], individual outcomes  
11  
12 are specified broadly, encompassing a child's whole life potential. For example, optimal health for the young  
13  
14 child includes the development of resilience and the opportunities to achieve throughout their life.  
15  
16

17  
18 A systematic review of the peer-reviewed literature across all sectors will synthesise the economic evidence  
19  
20 on interventions directed toward infants and children (those aged 0 to 5 years), for legislators, practitioners  
21  
22 and policy makers. Given the complementarity of interventions a systematic review of evidence that is not  
23  
24 siloed by sector has the capacity to broadly address the range of social determinants.  
25  
26

27 The aim of this study is to systematically review economic evidence on population interventions targeted at  
28  
29 children aged 0-5 years across multiple sectors including health, education and social welfare.  
30  
31  
32  
33  
34  
35

## 36 Methods and Analysis

### 37 Eligibility criteria

38  
39  
40  
41 The review will include economic evaluation studies in peer-reviewed journals containing both costs and  
42  
43 non-monetary outcomes (including cost-minimisation, cost-utility, cost-effectiveness) or costs and outcomes  
44  
45 valued in monetary terms (cost-benefit and other return on investment). The sectoral differences in  
46  
47 approach to economic evaluations, for example the use of cost-benefit analysis in the education sector and  
48  
49 cost effectiveness in health, will be transparently addressed. Given the potential variation in methodological  
50  
51 approach, we will present economic ratios specific to each sector or within sub-groups such as vulnerable  
52  
53 and low socioeconomic groups.  
54  
55  
56  
57  
58  
59  
60

Participants will primarily be infants and children aged 0 to 5 years; but may also include alternative groups such as parents, where outcomes relate to children. Studies including broader population age groups will be reviewed where data relating to 0 to 5 year-olds can be separately extracted.

Interventions may have broad scope including vaccination, nutrition and health management; early childhood learning, access to early childhood programs and the organisation of early learning; and the impact of poverty, maternal employment and parental incarceration. Acute care or diagnostic choices in tertiary care will not be included.

All interventions will be assessed against a control, although the comparator may be 'no intervention'.

Additional components of quality will be assessed within a set template and studies may be excluded if they do not meet the agreed criteria. Only studies that involve both an investment in early childhood and a measured benefit will be reviewed. Studies will be excluded if they do not report both costs (inputs) and benefits (outputs). Full inclusion and exclusion criteria are listed in Table 1.

Table 1

*Inclusion and exclusion criteria*

| Inclusion criteria                                                                                               | Exclusion criteria                                         |
|------------------------------------------------------------------------------------------------------------------|------------------------------------------------------------|
| Economic evaluations with investment in early childhood and measured long-term benefit                           | No outcomes quantified                                     |
| Peer reviewed journal articles                                                                                   | Supplements, letters, conference abstracts and proceedings |
| Participants: children aged 0-5 years and others (e.g. parents where outcomes relate to children aged 0-5 years) | No separate extraction for 0-5 years possible              |

|  |                                                                                                  |
|--|--------------------------------------------------------------------------------------------------|
|  | <p>Published prior to 2000</p> <p>Interventions of acute care, treatment, diagnostic choices</p> |
|--|--------------------------------------------------------------------------------------------------|

## Information sources

Following advice from generalist and specialist librarians (health and medical, business and economics), the following electronic databases have been identified as information sources: MEDLINE (Ovid), EMBASE (Ovid), PsycInfo (Ovid), National Health Service Economic Evaluation Database (NHS EED), Econ Lit, Paediatric Economic Database Evaluation (PEDE) and Education Resources Information Center (ERIC).

Reference lists of included studies will be hand searched to identify further papers. Authors of particularly germane studies may be contacted for additional pertinent material where considered necessary.

References cited in relevant systematic reviews will be searched for additional eligible studies.

## Search strategy

To account for indexing variation between electronic databases, tailored search specifications have been developed for each database. For example, databases dedicated to predefined criteria, such as "paediatric", do not require inclusion of that criterion in the search. The search strategy to be applied to the Ovid platform (MEDLINE, EMBASE, PsycInfo) will be used in a modified form for all other databases. For example, in Medline the search will combine exp Child, Preschool/, INFANT/, early childhood.mp and (preschool child\* or infant\* or prekindergarten or kinder\* or child\*).mp. This will be specified as: all infant (birth to 23 months) or newborn infant (birth to 1 month) or infant (1 to 23 months) or preschool child (2 to 5 years). Cost-Benefit Analysis/, exp Quality-Adjusted Life Years/, (return on invest\* or "cost and cost analysis" or economic evaluation or QALY or DALY or "quality adjusted life year\*" or ROI or cost benefit\*) will be combined.

1  
2  
3 The search in all databases will be limited to peer reviewed journals published since 2000; classified as  
4 journal article (i.e., no conference proceedings, supplements, or letters); and relating to human research.  
5  
6  
7 There will be no limitation on language of publication.  
8  
9

## 10 Study records

### 11 Data management

12  
13  
14  
15  
16  
17  
18 Search results will be imported into Covidence [17] and automatically deduplicated. Additional duplicates  
19 will be manually identified and removed once full text comparison is undertaken.  
20  
21  
22

### 23 Selection process

24  
25  
26 The CoLab Economics Systematic Review Consultancy Group comprises internationally recognised  
27 professional staff, consultants, and senior economists. This group provided advice on the design of the study  
28 and will be involved in other facets of the data collection and analysis.  
29  
30  
31

32  
33  
34 Two reviewers will independently examine the titles and abstracts retrieved through the search process to  
35 identify studies that do not meet the stated eligibility criteria. At this level any economic evaluation  
36 measuring cost effectiveness, cost-utility or return on investment from interventions affecting the  
37 immediate and/or lifetime health, education, labour or social welfare outcomes of infants and children,  
38 other than clinical treatment outcomes, will be included. Lack of consensus between reviewers on study  
39 inclusion will be resolved through discussion. Where necessary a third reviewer will be consulted. Full texts  
40 of the remaining potentially relevant records will be retrieved in order to proceed to independent evaluation  
41 by two reviewers.  
42  
43  
44  
45  
46  
47  
48  
49  
50

### 51 Data collection

52  
53  
54 An extraction template, using an adapted checklist, will be piloted and refined by staff, and circulated to the  
55 Consultancy group for further piloting, discussion and approval. Data items included in the extraction may be  
56  
57  
58  
59  
60

1  
2  
3 modified following piloting. At least two independent reviewers will extract data from the full text of  
4  
5 selected studies. Extracted data will be compared and conflicts between the reviewers discussed and  
6  
7 resolved.  
8  
9

## 10 Data items

11  
12  
13  
14 The characteristics of included studies will be described based on the following:

- 15  
16 I. General categorising information (sector information, category, condition, intervention, study  
17  
18 question)
- 19  
20 II. Country and income level (using World Bank classifications) [18]
- 21  
22 III. Population characteristics and reason for selection (age group, stratification, target criteria, number  
23  
24 of participants)
- 25  
26 IV. Perspective of the economic evaluation (societal, government, etc.)
- 27  
28 V. Time horizon
- 29  
30 VI. Economic study type and outcome ratio
- 31  
32 VII. Comparator(s) or base case and justification for comparator
- 33  
34 VIII. Costing approach (currency, index year for costs, standardisation methods, cost components, cost  
35  
36 sources, discount rate)
- 37  
38 IX. Outcomes (measure of benefit in evaluation, discount rate applied in outcomes)
- 39  
40 X. Sensitivity analyses (parameters, methods and results)
- 41  
42 XI. Credibility and conflicts of interest (e.g. funder)
- 43  
44 XII. Modelling (type, structure, assumptions, sources, cycle length and validation)
- 45  
46 XIII. Feasibility/necessity to contact study authors to obtain missing information
- 47  
48  
49  
50  
51  
52  
53  
54  
55  
56  
57  
58  
59  
60

1  
2  
3 XIV. Quality (subjective)  
4  
5

- 6 a. Research methods (PICO)  
7  
8  
9 b. Risk of bias – selection, performance, detection, attrition, reporting  
10  
11  
12 c. Imprecision - confidence intervals, sample size  
13  
14  
15 d. Inconsistency  
16  
17  
18 e. Publication bias  
19

20 At the full text retrieval stage reviewers will examine the economic methods used, the useability of studies  
21 containing partially age relevant data and the significance of studies that require modelling inputs.  
22

23  
24  
25  
26 Risk of bias in individual studies  
27

28  
29 The quality of the selected studies will be transparently reported based on the economic evaluation  
30 methods used, validity of assumptions and possible inherent biases. Two independent reviewers will assess  
31 the certainty of evidence considering risk of bias, imprecision, inconsistency, indirectness and publication  
32 bias. Five sources of bias in reported outcomes will be assessed: selection, performance, detection, attrition  
33 and reporting. Study authors who are contactable may be requested to provide pertinent and available  
34 missing data.  
35  
36  
37  
38  
39  
40  
41

42  
43 For each included study, both reviewers will assess the risk of bias and assign ratings of low, high or unclear  
44 risk of bias. Disagreement will be resolved via discussion between the two reviewers until they reach  
45 consensus or through referral to an independent third reviewer. Final decisions will be recorded in a 'Risk of  
46 bias' table with a rationale for each decision.  
47  
48  
49  
50  
51  
52  
53  
54  
55  
56  
57  
58  
59  
60

## Data

## Synthesis

Results will be reported consistent with the PRISMA 2009 checklist; a PRISMA diagram and checklist will be included at the completion of the review.

In consideration of differing economic evaluation methodologies across sectors, a narrative synthesis of data will be undertaken. Narrative format 'Summary of Findings' (SoF) tables will present the key results of the review, including ranking of the certainty of the evidence upon which these results are based. Tables will be developed according to the outcome variable, or the means of reporting returns on investment. Information on population, intervention, comparison, setting and certainty of evidence will also be reported.

Primary comparisons will be made within sector (e.g. health sector using QALYs). Secondly, cross sectoral comparisons will be explored using willingness-to-pay thresholds to convert health outcomes to monetary units.

## Patient and public involvement

This research will be done without patient involvement. Patients were not invited to comment on the study design and were not consulted to develop patient relevant outcomes or interpret the results. Patients were not invited to contribute to the writing or editing of this document for readability or accuracy.

## Discussion

This systematic review will be the first to consider cross-sector economic evaluation of investment in early childhood. Whilst this presents some methodological challenges, the results will provide invaluable information to assist in ranking whole-of-government priorities and forming policy recommendations. The project reflects a global perspective, with national policy implications.



1  
2  
3 The lack of consistent outcome measures between sectors represents a potential limitation of the review in  
4  
5 comparing cost-effectiveness. For example, the conversion of outcomes to monetary units is contentious  
6  
7 because of the assumptions required. Furthermore, benefits of early childhood intervention may be difficult  
8  
9 to quantify because they are intangible (e.g. resilience or self-belief) or because of extrapolation methods of  
10  
11 predicting far into the future (e.g. adult employment). Moreover, while the cost effectiveness and ROI of  
12  
13 outcomes in the health, social welfare and education sectors can be measured or estimated, impacts on  
14  
15 inequality, intergenerational outcomes and benefits at a societal level may be less easily quantified. Such  
16  
17 limitations will be addressed transparently and within subgroups where necessary.  
18  
19

20  
21  
22 Summary evidence will identify gaps in the literature and provide policy makers with cross-sectoral  
23  
24 information relevant to strategic decision-making for early childhood investment.  
25  
26  
27  
28  
29  
30  
31  
32  
33  
34  
35  
36  
37  
38  
39  
40  
41  
42  
43  
44  
45  
46  
47  
48  
49  
50  
51  
52  
53  
54  
55  
56  
57  
58  
59  
60

## References

1. Cunha F and J. Heckman, *The technology of skill formation*. American Economic Review, 2007. **97**: p. 31-47.
2. Rolnick, A. and R. Grunewald, *Early childhood development: Economic development with a high public return. Technical Report*. 2003.
3. Nores, M. and W.S. Barnett, *Benefits of early childhood interventions across the world: (Under) Investing in the very young*. . Economics of Education Review, 2010. **29**(2): p. 271-82.
4. Karoly, L., *The economic returns to early childhood education*. The Future of Children, 2016. **26**(2): p. 37-55.
5. Karoly, L., R. Kilburn, and J. Cannon, *Early childhood interventions proven results, future promise*. 2005, RAND Corporation,.
6. Doyle, O., et al., *Investing in early human development: Timing and economic efficiency*. Economics and Human Biology, 2009. **7**(1): p. 1-6.
7. Campbell, F., et al., *Early childhood investments substantially boost adult health*. Science, 2014. **343**(6178): p. 1478-85.
8. Hahn, R., et al., *Early childhood education to promote health equity: A community guide systematic review*. Journal of Public Health Management and Practice, 2016. **22**(5): p. E1-E8.
9. Piquero, A.R., et al., *Effects of early family/parent training programs on antisocial behavior and delinquency*. Journal of Experimental Criminology, 2009. **5**(2): p. 83-120.
10. Reynolds, A.J., et al., *Processes of Early Childhood Interventions to Adult Well-Being*. Child Development, 2017. **88**(2): p. 378-387.
11. Lee, S., S. Aos, and M. Miller, *Evidence-based programs to prevent children from entering and remaining in the child welfare system: Benefits and costs for Washington*. 2008, Washington State Institute for Public Policy: Olympia.
12. Doyle, O., et al., *Early skill formation and the efficiency of parental investment: A randomized controlled trial of home visiting*. . Labour Economics, 2017. **45**: p. 40-58.
13. Duncan, K., S. Macgillivray, and M. Renfrew, *Costs and savings of parenting interventions: Results of a systematic review*. Child: Care, Health and Development, 2017: p. 1-15.
14. Teager, W., S. Fox, and N. Stafford, *How Australia can invest early and return more: A new look at the \$15b cost and opportunity*. 2019, Early Intervention Foundation, The Front Project and CoLab at the Telethon Kids Institute,: Australia.
15. Atinc, T. and E. Gustaffson-Wright, *Early childhood development: the promise, the problem, and the path forward*. 2013, Center for Universal Education.
16. World Health Organisation, *Constitution of the World Health Organization – Basic Documents, Forty-fifth edition, Supplement 2006*, WHO.
17. *Covidence systematic review software*. Veritas Health Innovation: Melbourne, Australia.
18. World Bank. *New country classifications by income level: 2018-2019*. 2019; Available from: <https://blogs.worldbank.org/opendata/new-country-classifications-income-level-2018-2019>.

## Authors' contributions

Elizabeth Geelhoed (EG) led the conception and design of the study protocol and drafting the paper, and is the guarantor of the review.

Joelie Mandzufas (JM) contributed to the design of the study protocol and critical revision of drafts.

Phoebe George (PG) contributed to the design of the study protocol and critical revision of drafts.

Kenneth Strahan (KS) contributed to the design of the study protocol and critical revision of drafts.

Alison Duffield (AD) contributed to the design of the study protocol and critical revision of drafts.

Ian Li (IL) contributed to the conception and design of the study protocol and critical revision of drafts.

Donna Cross (DC) contributed to the conception and design of the study protocol and critical revision of drafts.

## Acknowledgements

The authors thank Jeff Borland and David Bloom for their advice.

## Funding

This work was supported by CoLab - Collaborate for Kids, a partnership between the Telethon Kids Institute and the Minderoo Foundation, made possible with funding from the Minderoo Foundation. Staff and external consultants are contracted by CoLab.

The funders had no input to the design of the study or development of the protocol.

## Competing interests

None declared.

**Medline(Ovid)**

|                                                                                                                                                                                                                                                                                                                                                                                                       |
|-------------------------------------------------------------------------------------------------------------------------------------------------------------------------------------------------------------------------------------------------------------------------------------------------------------------------------------------------------------------------------------------------------|
| 1. exp Child, Preschool/                                                                                                                                                                                                                                                                                                                                                                              |
| 2. INFANT/                                                                                                                                                                                                                                                                                                                                                                                            |
| 3. early childhood.mp. [mp=title, abstract, original title, name of substance word, subject heading word, floating sub-heading word, keyword heading word, protocol supplementary concept word, rare disease supplementary concept word, unique identifier, synonyms]                                                                                                                                 |
| 4. (preschool child* or infant* or prekindergarten or kinder* or child*).mp. [mp=title, abstract, original title, name of substance word, subject heading word, floating sub-heading word, keyword heading word, protocol supplementary concept word, rare disease supplementary concept word, unique identifier, synonyms]                                                                           |
| 5. 1 or 2 or 3 or 4                                                                                                                                                                                                                                                                                                                                                                                   |
| 6. exp Cost-Benefit Analysis/                                                                                                                                                                                                                                                                                                                                                                         |
| 7. exp Quality-Adjusted Life Years/                                                                                                                                                                                                                                                                                                                                                                   |
| 8. (return on invest* or "cost and cost analysis" or economic evaluation or QALY or DALY or "quality adjusted life year*" or ROI or cost benefit*).mp. [mp=title, abstract, original title, name of substance word, subject heading word, floating sub-heading word, keyword heading word, protocol supplementary concept word, rare disease supplementary concept word, unique identifier, synonyms] |
| 9. 6 or 7 or 8                                                                                                                                                                                                                                                                                                                                                                                        |
| 10. 5 and 9                                                                                                                                                                                                                                                                                                                                                                                           |
| 11. ("cost" or "costs").tw.                                                                                                                                                                                                                                                                                                                                                                           |
| 12. 10 and 11                                                                                                                                                                                                                                                                                                                                                                                         |
| 13. limit 12 to yr="2000 -Current"                                                                                                                                                                                                                                                                                                                                                                    |
| 14. limit 13 to journal article                                                                                                                                                                                                                                                                                                                                                                       |
| 15. limit 14 to humans                                                                                                                                                                                                                                                                                                                                                                                |
| 16. limit 15 to ("all infant (birth to 23 months)" or "newborn infant (birth to 1 month)" or "infant (1 to 23 months)" or "preschool child (2 to 5 years)")                                                                                                                                                                                                                                           |

**Embase(Ovid)**

|                                                                                                                                                                                                                                                                                                                                               |
|-----------------------------------------------------------------------------------------------------------------------------------------------------------------------------------------------------------------------------------------------------------------------------------------------------------------------------------------------|
| 1. exp Child, Preschool/                                                                                                                                                                                                                                                                                                                      |
| 2. INFANT/                                                                                                                                                                                                                                                                                                                                    |
| 3. early childhood.mp. [mp=title, abstract, heading word, drug trade name, original title, device manufacturer, drug manufacturer, device trade name, keyword, floating subheading word, candidate term word]                                                                                                                                 |
| 4. (preschool child* or infant* or prekindergarten or kinder* or child*).mp. [mp=title, abstract, heading word, drug trade name, original title, device manufacturer, drug manufacturer, device trade name, keyword, floating subheading word, candidate term word]                                                                           |
| 5. 1 or 2 or 3 or 4                                                                                                                                                                                                                                                                                                                           |
| 6. exp Cost-Benefit Analysis/                                                                                                                                                                                                                                                                                                                 |
| 7. exp Quality-Adjusted Life Years/                                                                                                                                                                                                                                                                                                           |
| 8. (return on invest* or "cost and cost analysis" or economic evaluation or QALY or DALY or "quality adjusted life year*" or ROI or cost benefit*).mp. [mp=title, abstract, heading word, drug trade name, original title, device manufacturer, drug manufacturer, device trade name, keyword, floating subheading word, candidate term word] |
| 9. 6 or 7 or 8                                                                                                                                                                                                                                                                                                                                |
| 10. 5 and 9                                                                                                                                                                                                                                                                                                                                   |
| 11. ("cost" or "costs").tw.                                                                                                                                                                                                                                                                                                                   |
| 12. 10 and 11                                                                                                                                                                                                                                                                                                                                 |

|                                                            |
|------------------------------------------------------------|
| 13. limit 12 to yr="2000 -Current"                         |
| 14. limit 13 to journal                                    |
| 15. limit 14 to human                                      |
| 16. limit 15 to (infant or preschool child <1 to 6 years>) |

### Psycinfo(Ovid)

|                                                                                                                                                                                                                                                              |
|--------------------------------------------------------------------------------------------------------------------------------------------------------------------------------------------------------------------------------------------------------------|
| 1. early childhood.mp. [mp=title, abstract, heading word, table of contents, key concepts, original title, tests & measures]                                                                                                                                 |
| 2. (preschool child* or infant* or prekindergarten or kinder* or child*).mp. [mp=title, abstract, heading word, table of contents, key concepts, original title, tests & measures]                                                                           |
| 3. 1 or 2                                                                                                                                                                                                                                                    |
| 4. (return on invest* or "cost and cost analysis" or economic evaluation or QALY or DALY or "quality adjusted life year*" or ROI or cost benefit*).mp. [mp=title, abstract, heading word, table of contents, key concepts, original title, tests & measures] |
| 5. 3 and 4                                                                                                                                                                                                                                                   |
| 6. cost.mp. or costs.tw. [mp=title, abstract, heading word, table of contents, key concepts, original title, tests & measures]                                                                                                                               |
| 7. 5 and 6                                                                                                                                                                                                                                                   |
| 8. limit 7 to yr="2000 -Current"                                                                                                                                                                                                                             |
| 9. limit 8 to peer reviewed journal                                                                                                                                                                                                                          |
| 10. limit 9 to human                                                                                                                                                                                                                                         |
| 11. limit 10 to (100 childhood or 120 neonatal or 140 infancy <2 to 23 mo> or 160 preschool age)                                                                                                                                                             |

### Eric(ProQuest)

|                                                                             |
|-----------------------------------------------------------------------------|
| 1. Ab (early childhood or infant* or toddler* or child*) AND ab(cost*)      |
| 2. Filter(2000-current date)                                                |
| 3. Filter (Peer reviewed)                                                   |
| 4. Filter(scholarly journal articles)                                       |
| 5. Filter(Early Childhood Education or Kindergarten or Preschool education) |

### EconLit(EBSCO)

|    |                                                                                                                                                                                                                                                                                                                              |
|----|------------------------------------------------------------------------------------------------------------------------------------------------------------------------------------------------------------------------------------------------------------------------------------------------------------------------------|
| S8 | (AB child* OR AB ( infant or infants ) OR AB ( baby or babies ) OR AB ( preschool or kindergarten or "early childhood education" ) OR AB newborn) AND (S4 AND S7)<br><b>Expanders</b> - Apply related words<br><b>Search modes</b> - Boolean/Phrase                                                                          |
| S7 | AB child* OR AB ( infant or infants ) OR AB ( baby or babies ) OR AB ( preschool or kindergarten or "early childhood education" ) OR AB newborn<br><b>Limiters</b> - Scholarly (Peer Reviewed) Journals; Published Date: 20000101-20191231<br><b>Expanders</b> - Apply related words<br><b>Search modes</b> - Boolean/Phrase |
| S6 | AB child* OR AB ( infant or infants ) OR AB ( baby or babies ) OR AB ( preschool or kindergarten or "early childhood education" ) OR AB newborn<br><b>Limiters</b> - Scholarly (Peer Reviewed) Journals<br><b>Expanders</b> - Apply related words<br><b>Search modes</b> - Boolean/Phrase                                    |

|    |                                                                                                                                                                                                                                                                                                                                                                                                                  |
|----|------------------------------------------------------------------------------------------------------------------------------------------------------------------------------------------------------------------------------------------------------------------------------------------------------------------------------------------------------------------------------------------------------------------|
| S5 | AB child* OR AB ( infant or infants ) OR AB ( baby or babies ) OR AB ( preschool or kindergarten or "early childhood education" ) OR AB newborn<br><b>Expanders</b> - Apply related words<br><b>Search modes</b> - Boolean/Phrase                                                                                                                                                                                |
| S4 | AB ( "cost benefit analysis" or "cost-benefit analysis" or "cost effective analysis" ) OR AB ( "economic outcomes" or "economic evaluation" or "cost effectiveness" ) OR AB cost analysis OR AB economic analysis OR "cost utility"<br><b>Limiters</b> - Scholarly (Peer Reviewed) Journals; Published Date: 20000101-20191231<br><b>Expanders</b> - Apply related words<br><b>Search modes</b> - Boolean/Phrase |
| S3 | AB ( "cost benefit analysis" or "cost-benefit analysis" or "cost effective analysis" ) OR AB ( "economic outcomes" or "economic evaluation" or "cost effectiveness" ) OR AB cost analysis OR AB economic analysis OR "cost utility"<br><b>Limiters</b> - Published Date: 20000101-20191231<br><b>Expanders</b> - Apply related words<br><b>Search modes</b> - Boolean/Phrase                                     |
| S2 | AB ( "cost benefit analysis" or "cost-benefit analysis" or "cost effective analysis" ) OR AB ( "economic outcomes" or "economic evaluation" or "cost effectiveness" ) OR AB cost analysis OR AB economic analysis OR "cost utility"<br><b>Expanders</b> - Apply related words<br><b>Search modes</b> - Boolean/Phrase                                                                                            |
| S1 | AB ( "cost benefit analysis" or "cost-benefit analysis" or "cost effective analysis" ) OR AB ( "economic outcomes" or "economic evaluation" or "cost effectiveness" ) OR AB cost analysis OR AB economic analysis OR "cost utility"<br><b>Expanders</b> - Apply related words<br><b>Search modes</b> - Boolean/Phrase                                                                                            |

### PEDE(SickKids)

The PEDE database will only show less than 300 articles at a time, if more it will cause you to refine your search. Therefore for this database by limiting the years searched

|                                                                                                                                                                                                      |
|------------------------------------------------------------------------------------------------------------------------------------------------------------------------------------------------------|
| TITLE_ABSTRACT child* and TITLE_ABSTRACT cost*<br>Limiters: neonates (0-1month, infants ( 1 month to 1 year) child 1-12<br>2000-2017<br><b>1401 records, more than 300 please refine your search</b> |
| TITLE_ABSTRACT child* and TITLE_ABSTRACT cost*<br>Limiters: neonates (0-1month, infants ( 1 month to 1 year) child 1-12<br>Limited: 2000-03                                                          |
| TITLE_ABSTRACT child* and TITLE_ABSTRACT cost*<br>Limiters: neonates (0-1month, infants ( 1 month to 1 year) child 1-12<br>Limited:2004-05                                                           |
| TITLE_ABSTRACT child* and TITLE_ABSTRACT cost*<br>Limiters: neonates (0-1month, infants ( 1 month to 1 year) child 1-12<br>Limited 2006-07                                                           |
| TITLE_ABSTRACT child* and TITLE_ABSTRACT cost*<br>Limiters: neonates (0-1month, infants ( 1 month to 1 year) child 1-12<br>Limited 2007-10                                                           |
| TITLE_ABSTRACT child* and TITLE_ABSTRACT cost*<br>Limiters: neonates (0-1month, infants ( 1 month to 1 year) child 1-12<br>Limited 2010-13                                                           |
| TITLE_ABSTRACT child* and TITLE_ABSTRACT cost*                                                                                                                                                       |

|                                                                                                                                         |
|-----------------------------------------------------------------------------------------------------------------------------------------|
| Limiters: neonates (0-1month, infants ( 1 month to 1 year) child 1-12<br>Limited 2014-16                                                |
| TITLE_ABSTRACT child* and TITLE_ABSTRACT cost*<br>Limiters: neonates (0-1month, infants ( 1 month to 1 year) child 1-12<br>Limited 2017 |

For peer review only

**PRISMA-P (Preferred Reporting Items for Systematic review and Meta-Analysis Protocols) 2015 checklist: recommended items to address in a systematic review protocol\***

| Section and topic                 | Item No | Checklist item                                                                                                                                                                                                            | Information reported                |                                     | Line number(s) |
|-----------------------------------|---------|---------------------------------------------------------------------------------------------------------------------------------------------------------------------------------------------------------------------------|-------------------------------------|-------------------------------------|----------------|
|                                   |         |                                                                                                                                                                                                                           | Yes                                 | No                                  |                |
| <b>ADMINISTRATIVE INFORMATION</b> |         |                                                                                                                                                                                                                           |                                     |                                     |                |
| <b>Title</b>                      |         |                                                                                                                                                                                                                           |                                     |                                     |                |
| <b>Identification</b>             | 1a      | Identify the report as a protocol of a systematic review                                                                                                                                                                  | <input checked="" type="checkbox"/> | <input type="checkbox"/>            | 4              |
| <b>Update</b>                     | 1b      | If the protocol is for an update of a previous systematic review, identify as such                                                                                                                                        | <input type="checkbox"/>            | <input checked="" type="checkbox"/> |                |
| <b>Registration</b>               | 2       | If registered, provide the name of the registry (e.g., PROSPERO) and registration number in the Abstract                                                                                                                  | <input checked="" type="checkbox"/> | <input type="checkbox"/>            | 60             |
| <b>Authors</b>                    |         |                                                                                                                                                                                                                           |                                     |                                     |                |
| <b>Contact</b>                    | 3a      | Provide name, institutional affiliation, and e-mail address of all protocol authors; provide physical mailing address of corresponding author                                                                             | <input checked="" type="checkbox"/> | <input type="checkbox"/>            | 10-30          |
| <b>Contributions</b>              | 3b      | Describe contributions of protocol authors and identify the guarantor of the review                                                                                                                                       | <input checked="" type="checkbox"/> | <input type="checkbox"/>            | 287-298        |
| <b>Amendments</b>                 | 4       | If the protocol represents an amendment of a previously completed or published protocol, identify as such and list changes; otherwise, state plan for documenting important protocol amendments                           | <input type="checkbox"/>            | <input checked="" type="checkbox"/> |                |
| <b>Support</b>                    |         |                                                                                                                                                                                                                           |                                     |                                     |                |
| <b>Sources</b>                    | 5a      | Indicate sources of financial or other support for the review                                                                                                                                                             | <input checked="" type="checkbox"/> | <input type="checkbox"/>            | 299-302        |
| <b>Sponsor</b>                    | 5b      | Provide name for the review funder and/or sponsor                                                                                                                                                                         | <input checked="" type="checkbox"/> | <input type="checkbox"/>            | 300-302        |
| <b>Role of sponsor/funder</b>     | 5c      | Describe roles of funder(s), sponsor(s), and/or institution(s), if any, in developing the protocol                                                                                                                        | <input checked="" type="checkbox"/> | <input type="checkbox"/>            | 303            |
| <b>INTRODUCTION</b>               |         |                                                                                                                                                                                                                           |                                     |                                     |                |
| <b>Rationale</b>                  | 6       | Describe the rationale for the review in the context of what is already known                                                                                                                                             | <input checked="" type="checkbox"/> | <input type="checkbox"/>            | 72-103         |
| <b>Objectives</b>                 | 7       | Provide an explicit statement of the question(s) the review will address with reference to participants, interventions, comparators, and outcomes (PICO)                                                                  | <input checked="" type="checkbox"/> | <input type="checkbox"/>            | 104-105        |
| <b>METHODS</b>                    |         |                                                                                                                                                                                                                           |                                     |                                     |                |
| <b>Eligibility criteria</b>       | 8       | Specify the study characteristics (e.g., PICO, study design, setting, time frame) and report characteristics (e.g., years considered, language, publication status) to be used as criteria for eligibility for the review | <input checked="" type="checkbox"/> | <input type="checkbox"/>            | 108-129        |
| <b>Information sources</b>        | 9       | Describe all intended information sources (e.g., electronic databases, contact with study authors, trial registers, or other grey literature sources) with planned dates of coverage                                      | <input checked="" type="checkbox"/> | <input type="checkbox"/>            | 131-138        |
| <b>Search strategy</b>            | 10      | Present draft of search strategy to be used for at least one electronic database, including planned limits, such that it could be repeated                                                                                | <input checked="" type="checkbox"/> | <input type="checkbox"/>            | 139-152        |
| <b>STUDY RECORDS</b>              |         |                                                                                                                                                                                                                           |                                     |                                     |                |



|    |                                           |     |                                                                                                                                                                                                                                             |                                     |                                     |         |
|----|-------------------------------------------|-----|---------------------------------------------------------------------------------------------------------------------------------------------------------------------------------------------------------------------------------------------|-------------------------------------|-------------------------------------|---------|
| 1  |                                           |     |                                                                                                                                                                                                                                             |                                     |                                     |         |
| 2  | <b>Data management</b>                    | 11a | Describe the mechanism(s) that will be used to manage records and data throughout the review                                                                                                                                                | <input checked="" type="checkbox"/> | <input type="checkbox"/>            | 153-156 |
| 3  |                                           |     |                                                                                                                                                                                                                                             |                                     |                                     |         |
| 4  | <b>Selection process</b>                  | 11b | State the process that will be used for selecting studies (e.g., two independent reviewers) through each phase of the review (i.e., screening, eligibility, and inclusion in meta-analysis)                                                 | <input checked="" type="checkbox"/> | <input type="checkbox"/>            | 157-168 |
| 5  |                                           |     |                                                                                                                                                                                                                                             |                                     |                                     |         |
| 6  | <b>Data collection process</b>            | 11c | Describe planned method of extracting data from reports (e.g., piloting forms, done independently, in duplicate), any processes for obtaining and confirming data from investigators                                                        | <input checked="" type="checkbox"/> | <input type="checkbox"/>            | 169-174 |
| 7  |                                           |     |                                                                                                                                                                                                                                             |                                     |                                     |         |
| 8  | <b>Data items</b>                         | 12  | List and define all variables for which data will be sought (e.g., PICO items, funding sources), any pre-planned data assumptions and simplifications                                                                                       | <input checked="" type="checkbox"/> | <input type="checkbox"/>            | 175-200 |
| 9  |                                           |     |                                                                                                                                                                                                                                             |                                     |                                     |         |
| 10 | <b>Outcomes and prioritization</b>        | 13  | List and define all outcomes for which data will be sought, including prioritization of main and additional outcomes, with rationale                                                                                                        | <input checked="" type="checkbox"/> | <input type="checkbox"/>            | 175-200 |
| 11 |                                           |     |                                                                                                                                                                                                                                             |                                     |                                     |         |
| 12 | <b>Risk of bias in individual studies</b> | 14  | Describe anticipated methods for assessing risk of bias of individual studies, including whether this will be done at the outcome or study level, or both; state how this information will be used in data synthesis                        | <input checked="" type="checkbox"/> | <input type="checkbox"/>            | 201-211 |
| 13 |                                           |     |                                                                                                                                                                                                                                             |                                     |                                     |         |
| 14 |                                           |     |                                                                                                                                                                                                                                             |                                     |                                     |         |
| 15 | <b>DATA</b>                               |     |                                                                                                                                                                                                                                             |                                     |                                     |         |
| 16 | <b>Synthesis</b>                          | 15a | Describe criteria under which study data will be quantitatively synthesized                                                                                                                                                                 | <input checked="" type="checkbox"/> | <input type="checkbox"/>            | 222-224 |
| 17 |                                           | 15b | If data are appropriate for quantitative synthesis, describe planned summary measures, methods of handling data, and methods of combining data from studies, including any planned exploration of consistency (e.g., $I^2$ , Kendall's tau) | <input type="checkbox"/>            | <input checked="" type="checkbox"/> |         |
| 18 |                                           |     |                                                                                                                                                                                                                                             |                                     |                                     |         |
| 19 |                                           | 15c | Describe any proposed additional analyses (e.g., sensitivity or subgroup analyses, meta-regression)                                                                                                                                         | <input type="checkbox"/>            | <input checked="" type="checkbox"/> |         |
| 20 |                                           |     |                                                                                                                                                                                                                                             |                                     |                                     |         |
| 21 |                                           | 15d | If quantitative synthesis is not appropriate, describe the type of summary planned                                                                                                                                                          | <input checked="" type="checkbox"/> | <input type="checkbox"/>            | 217-224 |
| 22 |                                           |     |                                                                                                                                                                                                                                             |                                     |                                     |         |
| 23 | <b>Meta-bias(es)</b>                      | 16  | Specify any planned assessment of meta-bias(es) (e.g., publication bias across studies, selective reporting within studies)                                                                                                                 | <input checked="" type="checkbox"/> | <input type="checkbox"/>            | 217-219 |
| 24 |                                           |     |                                                                                                                                                                                                                                             |                                     |                                     |         |
| 25 | <b>Confidence in cumulative evidence</b>  | 17  | Describe how the strength of the body of evidence will be assessed (e.g., GRADE)                                                                                                                                                            | <input checked="" type="checkbox"/> | <input type="checkbox"/>            | 217-219 |
| 26 |                                           |     |                                                                                                                                                                                                                                             |                                     |                                     |         |
| 27 |                                           |     |                                                                                                                                                                                                                                             |                                     |                                     |         |
| 28 |                                           |     |                                                                                                                                                                                                                                             |                                     |                                     |         |
| 29 |                                           |     |                                                                                                                                                                                                                                             |                                     |                                     |         |
| 30 |                                           |     |                                                                                                                                                                                                                                             |                                     |                                     |         |
| 31 |                                           |     |                                                                                                                                                                                                                                             |                                     |                                     |         |
| 32 |                                           |     |                                                                                                                                                                                                                                             |                                     |                                     |         |
| 33 |                                           |     |                                                                                                                                                                                                                                             |                                     |                                     |         |
| 34 |                                           |     |                                                                                                                                                                                                                                             |                                     |                                     |         |
| 35 |                                           |     |                                                                                                                                                                                                                                             |                                     |                                     |         |
| 36 |                                           |     |                                                                                                                                                                                                                                             |                                     |                                     |         |
| 37 |                                           |     |                                                                                                                                                                                                                                             |                                     |                                     |         |
| 38 |                                           |     |                                                                                                                                                                                                                                             |                                     |                                     |         |
| 39 |                                           |     |                                                                                                                                                                                                                                             |                                     |                                     |         |
| 40 |                                           |     |                                                                                                                                                                                                                                             |                                     |                                     |         |
| 41 |                                           |     |                                                                                                                                                                                                                                             |                                     |                                     |         |
| 42 |                                           |     |                                                                                                                                                                                                                                             |                                     |                                     |         |
| 43 |                                           |     |                                                                                                                                                                                                                                             |                                     |                                     |         |
| 44 |                                           |     |                                                                                                                                                                                                                                             |                                     |                                     |         |
| 45 |                                           |     |                                                                                                                                                                                                                                             |                                     |                                     |         |
| 46 |                                           |     |                                                                                                                                                                                                                                             |                                     |                                     |         |

# BMJ Open

## Long-term economic outcomes for interventions in early childhood: Protocol for a systematic review

|                                 |                                                                                                                                                                                                                                                                                                                                                                                                                                  |
|---------------------------------|----------------------------------------------------------------------------------------------------------------------------------------------------------------------------------------------------------------------------------------------------------------------------------------------------------------------------------------------------------------------------------------------------------------------------------|
| Journal:                        | <i>BMJ Open</i>                                                                                                                                                                                                                                                                                                                                                                                                                  |
| Manuscript ID                   | bmjopen-2019-036647.R2                                                                                                                                                                                                                                                                                                                                                                                                           |
| Article Type:                   | Protocol                                                                                                                                                                                                                                                                                                                                                                                                                         |
| Date Submitted by the Author:   | 03-Jul-2020                                                                                                                                                                                                                                                                                                                                                                                                                      |
| Complete List of Authors:       | Geelhoed, Elizabeth; Telethon Kids Institute<br>Mandzufas, Joeline; Telethon Kids Institute, George, Phoebe; Telethon Kids Institute<br>Strahan, Ken; Telethon Kids Institute<br>Duffield, Alison; Telethon Kids Institute<br>Li, Ian; University of Western Australia, School of Population and Global Health<br>Cross, Donna; Telethon Kids Institute; University of Western Australia, School of Population and Global Health |
| <b>Primary Subject Heading</b>: | Public health                                                                                                                                                                                                                                                                                                                                                                                                                    |
| Secondary Subject Heading:      | Health economics, Paediatrics                                                                                                                                                                                                                                                                                                                                                                                                    |
| Keywords:                       | HEALTH ECONOMICS, PUBLIC HEALTH, Community child health < PAEDIATRICS, Health economics < HEALTH SERVICES ADMINISTRATION & MANAGEMENT                                                                                                                                                                                                                                                                                            |
|                                 |                                                                                                                                                                                                                                                                                                                                                                                                                                  |

SCHOLARONE™  
Manuscripts



I, the Submitting Author has the right to grant and does grant on behalf of all authors of the Work (as defined in the below author licence), an exclusive licence and/or a non-exclusive licence for contributions from authors who are: i) UK Crown employees; ii) where BMJ has agreed a CC-BY licence shall apply, and/or iii) in accordance with the terms applicable for US Federal Government officers or employees acting as part of their official duties; on a worldwide, perpetual, irrevocable, royalty-free basis to BMJ Publishing Group Ltd ("BMJ") its licensees and where the relevant Journal is co-owned by BMJ to the co-owners of the Journal, to publish the Work in this journal and any other BMJ products and to exploit all rights, as set out in our [licence](#).

The Submitting Author accepts and understands that any supply made under these terms is made by BMJ to the Submitting Author unless you are acting as an employee on behalf of your employer or a postgraduate student of an affiliated institution which is paying any applicable article publishing charge ("APC") for Open Access articles. Where the Submitting Author wishes to make the Work available on an Open Access basis (and intends to pay the relevant APC), the terms of reuse of such Open Access shall be governed by a Creative Commons licence – details of these licences and which [Creative Commons](#) licence will apply to this Work are set out in our licence referred to above.

Other than as permitted in any relevant BMJ Author's Self Archiving Policies, I confirm this Work has not been accepted for publication elsewhere, is not being considered for publication elsewhere and does not duplicate material already published. I confirm all authors consent to publication of this Work and authorise the granting of this licence.

## Long term economic outcomes for interventions in early childhood: protocol for a systematic review

Geelhoed, E., Mandzufas, J., George, P., Strahan, K., Duffield, A., Li, I., Cross, D

### Authors

Elizabeth Geelhoed (1) : [liz.geelhoed@telethonkids.org.au](mailto:liz.geelhoed@telethonkids.org.au)  
Joelie Mandzufas (1) : [joelie.mandzufas@telethonkids.org.au](mailto:joelie.mandzufas@telethonkids.org.au)  
Phoebe George (1) : [phoebe.george@telethonkids.org.au](mailto:phoebe.george@telethonkids.org.au)  
Kenneth Strahan (1) : [ken@strahan-research.com](mailto:ken@strahan-research.com)  
Alison Duffield (1) : [Alison.duffield@telethonkids.org.au](mailto:Alison.duffield@telethonkids.org.au)  
Ian Li (2) : [ian.li@uwa.edu.au](mailto:ian.li@uwa.edu.au)  
Donna Cross (1,2) : [donna.cross@telethonkids.org.au](mailto:donna.cross@telethonkids.org.au)

### Affiliations

<sup>1</sup>Telethon Kids Institute, PO Box 855, West Perth WA 6872, Australia

<sup>2</sup>The University of Western Australia, 35 Stirling Highway, Perth WA 6009, Australia

### Corresponding author:

Elizabeth Geelhoed

Telethon Kids Institute

Telethon Kids Institute, PO Box 855, West Perth WA 6872, Australia

[liz.geelhoed@telethonkids.org.au](mailto:liz.geelhoed@telethonkids.org.au)

Word count: 2099 words

## Abstract

### **Introduction:**

Investment in early childhood produces positive returns: for the child, the family and the community.

Benefits have been shown to be significant within certain parameters, but a systematic review of the

economic evidence across multiple sectors including health, education and social welfare will have the

capacity to inform policy relative to the full range of social determinants. This review will take a broad

approach, encompassing a range of costs and benefits to enable the identification of the most beneficial

investments in early childhood and to highlight gaps in current research.

### **Methods and analysis:**

Economic evaluations incorporating both costs and long-term outcomes of early childhood interventions and

programs will be included. Outcomes may be valued in monetary units or quantified non-monetary units

(e.g. quality adjusted life years, disability adjusted life years). Results will be expressed as a ratio according to

the outcome; with monetary outcomes expressed as cost-benefit ratios or return on investment (ROI), and

non-monetary outcomes expressed as cost per quality-adjusted life year (QALY) or disability-adjusted life

year (DALY). The target population is children aged 0-5 years.

Extensive database searches across sectors will be undertaken. The review will involve five phases: defining

the research question, identifying relevant studies, selecting studies, extracting and collating data, and

summarising and reporting results. The search commenced in 2019 and the expected end date is December

2020.

### **Ethics and dissemination:**

The findings of this review will inform policy makers and practitioners in public health, education, social

welfare and primary care settings. The publication plan includes a series of academic publications, and policy

1  
2  
3 papers prepared and disseminated through Telethon Kids Institute networks. Exemption from ethics  
4  
5 approval was granted by the University of Western Australia Human Ethics Office (RA/4/20/5677).  
6  
7

#### 8 **Systematic review registration:** 9

10  
11 This protocol has been registered with PROSPERO: Registration number CRD42020145901.  
12  
13

#### 14 **Article summary** 15

##### 16 **Strengths and limitations of this study** 17

- 18 • Holistic approach to review evidence of early childhood investment
- 19 • Identification of gaps in the literature
- 20 • Internationally based  
21

##### 22 **Limitations** 23

- 24 • Different methodological approaches according to discipline and/or sector
- 25 • Contrasting priorities for investment according to income level of country  
26  
27  
28  
29  
30  
31  
32  
33  
34  
35  
36  
37  
38  
39  
40  
41  
42  
43  
44  
45  
46  
47  
48  
49  
50  
51  
52  
53  
54  
55  
56  
57  
58  
59  
60

## Introduction

Evidence indicates that investment in early childhood generates positive returns, for the child, the family and the wider community [1-5]. Benefits to children in the short term include the development of resilience, improved cognitive skills, reduced school absenteeism and reduced risk of disease. Longer term outcomes include better employment pathways [1, 2], improved health [3, 6-8] reduced dependency on welfare (including social services, incarceration and juvenile justice) [9-11] and reduction in inequality [3, 5]. This is particularly so for children who struggle to pursue their full potential, due to poor health [6-8], lack of opportunities to learn [1-5], and/or deprivation of care [12, 13]. Ultimately these benefits have implications for improving national productivity and gross domestic product (GDP) [1, 2, 5]. Conversely the cost of failing to adequately support children has implications for the child and the community, and, through the social and economic implications of that failure, to the national economy [14]. While the benefits of investment in early childhood have been shown to be significant within certain parameters, to date there is limited evidence addressing investment across multiple sectors (including health, education and social welfare) [15].

Much of the research on successful early childhood interventions and programs supports the need to intervene prior to formal school entry. For instance, developmental neuroscience emphasises ages 0 to 5 years as the optimal time to intervene [3] based on the rate of change that occurs physically and mentally during this period. Interventions initiated between the ages of 0 and 3 years have been shown to yield the highest economic returns, particularly for children experiencing adversity [6].

While the benefit of early childhood investment is well-established per se, priorities for the best allocation of resources are less clear. Understanding the comparative 'value' of a program [5] is central to enabling policy choices. This 'value' can be expressed in terms of cost-effectiveness (the cost required to achieve a given outcome), as cost-benefit (the ratio of cost inputs to dollar benefits) or as Return on Investment (ROI), which compares net profit with cost inputs. Typically, health programs are valued according to cost per Quality

1  
2  
3 Adjusted Life Year (QALY) or cost per Disability Adjusted Life Year (DALY) whereas in education, value is more  
4  
5 typically presented in terms of cost-benefit or ROI.  
6  
7

8 Consistent with the World Health Organization (WHO) definition of health as "a state of complete physical,  
9  
10 mental and social well-being and not merely the absence of disease or infirmity" [16], individual outcomes  
11  
12 are specified broadly, encompassing a child's whole life potential. For example, optimal health for the young  
13  
14 child includes the development of resilience and the opportunities to achieve throughout their life.  
15  
16

17  
18 A systematic review of the peer-reviewed literature across all sectors will synthesise the economic evidence  
19  
20 on interventions directed toward infants and children (those aged 0 to 5 years), for legislators, practitioners  
21  
22 and policy makers. Given the complementarity of interventions a systematic review of evidence that is not  
23  
24 siloed by sector has the capacity to broadly address the range of social determinants.  
25  
26

27 The aim of this study is to systematically review economic evidence on population interventions targeted at  
28  
29 children aged 0-5 years across multiple sectors including health, education and social welfare.  
30  
31  
32  
33  
34  
35

## 36 Methods and Analysis

### 37 Eligibility criteria

38  
39  
40  
41 The review will include economic evaluation studies in peer-reviewed journals containing both costs and  
42  
43 non-monetary outcomes (including cost-minimisation, cost-utility, cost-effectiveness) or costs and outcomes  
44  
45 valued in monetary terms (cost-benefit and other return on investment). The sectoral differences in  
46  
47 approach to economic evaluations, for example the use of cost-benefit analysis in the education sector and  
48  
49 cost effectiveness in health, will be transparently addressed. Given the potential variation in methodological  
50  
51 approach, we will present economic ratios specific to each sector or within sub-groups such as vulnerable  
52  
53 and low socioeconomic groups.  
54  
55  
56  
57  
58  
59  
60



Participants will primarily be infants and children aged 0 to 5 years; but may also include alternative groups such as parents, where outcomes relate to children. Studies including broader population age groups will be reviewed where data relating to 0 to 5 year-olds can be separately extracted.

Interventions may have broad scope including vaccination, nutrition and health management; early childhood learning, access to early childhood programs and the organisation of early learning; and the impact of poverty, maternal employment and parental incarceration. Acute care or diagnostic choices in tertiary care will not be included.

All interventions will be assessed against a control, although the comparator may be 'no intervention'.

Additional components of quality will be assessed within a set template and studies may be excluded if they do not meet the agreed criteria. Only studies that involve both an investment in early childhood and a measured benefit will be reviewed. Studies will be excluded if they do not report both costs (inputs) and benefits (outputs). Full inclusion and exclusion criteria are listed in Table 1.

Table 1

*Inclusion and exclusion criteria*

| Inclusion criteria                                                                                               | Exclusion criteria                                         |
|------------------------------------------------------------------------------------------------------------------|------------------------------------------------------------|
| Economic evaluations with investment in early childhood and measured long-term benefit                           | No outcomes quantified                                     |
| Peer reviewed journal articles                                                                                   | Supplements, letters, conference abstracts and proceedings |
| Participants: children aged 0-5 years and others (e.g. parents where outcomes relate to children aged 0-5 years) | No separate extraction for 0-5 years possible              |

|  |                                                                                                  |
|--|--------------------------------------------------------------------------------------------------|
|  | <p>Published prior to 2000</p> <p>Interventions of acute care, treatment, diagnostic choices</p> |
|--|--------------------------------------------------------------------------------------------------|

## Information sources

Following advice from generalist and specialist librarians (health and medical, business and economics), the following electronic databases have been identified as information sources: MEDLINE (Ovid), EMBASE (Ovid), PsycInfo (Ovid), National Health Service Economic Evaluation Database (NHS EED), Econ Lit, Paediatric Economic Database Evaluation (PEDE) and Education Resources Information Center (ERIC).

Reference lists of included studies will be hand searched to identify further papers. Authors of particularly germane studies may be contacted for additional pertinent material where considered necessary.

References cited in relevant systematic reviews will be searched for additional eligible studies.

## Search strategy

To account for indexing variation between electronic databases, tailored search specifications have been developed for each database. For example, databases dedicated to predefined criteria, such as "paediatric", do not require inclusion of that criterion in the search. The search strategy to be applied to the Ovid platform (MEDLINE, EMBASE, PsycInfo) will be used in a modified form for all other databases. For example, in Medline the search will combine exp Child, Preschool/, INFANT/, early childhood.mp and (preschool child\* or infant\* or prekindergarten or kinder\* or child\*).mp. This will be specified as: all infant (birth to 23 months) or newborn infant (birth to 1 month) or infant (1 to 23 months) or preschool child (2 to 5 years). Cost-Benefit Analysis/, exp Quality-Adjusted Life Years/, (return on invest\* or "cost and cost analysis" or economic evaluation or QALY or DALY or "quality adjusted life year\*" or ROI or cost benefit\*) will be combined. The complete search strategy is published as supplementary information.

1  
2  
3 The search in all databases will be limited to peer reviewed journals published since 2000; classified as  
4 journal article (i.e., no conference proceedings, supplements, or letters); and relating to human research.  
5  
6  
7 There will be no limitation on language of publication.  
8  
9

## 10 Study records

### 11 Data management

12  
13  
14  
15  
16  
17  
18 Search results will be imported into Covidence [17] and automatically deduplicated. Additional duplicates  
19 will be manually identified and removed once full text comparison is undertaken.  
20  
21  
22

### 23 Selection process

24  
25  
26 The CoLab Economics Systematic Review Consultancy Group comprises internationally recognised  
27 professional staff, consultants, and senior economists. This group provided advice on the design of the study  
28 and will be involved in other facets of the data collection and analysis.  
29  
30  
31

32  
33  
34 Two reviewers will independently examine the titles and abstracts retrieved through the search process to  
35 identify studies that do not meet the stated eligibility criteria. At this level any economic evaluation  
36 measuring cost effectiveness, cost-utility or return on investment from interventions affecting the  
37 immediate and/or lifetime health, education, labour or social welfare outcomes of infants and children,  
38 other than clinical treatment outcomes, will be included. Lack of consensus between reviewers on study  
39 inclusion will be resolved through discussion. Where necessary a third reviewer will be consulted. Full texts  
40 of the remaining potentially relevant records will be retrieved in order to proceed to independent evaluation  
41 by two reviewers.  
42  
43  
44  
45  
46  
47  
48  
49  
50  
51

### 52 Data collection

53  
54  
55  
56 An extraction template, using an adapted checklist, will be piloted and refined by staff, and circulated to the  
57 Consultancy group for further piloting, discussion and approval. Standard checklists will be considered and  
58  
59  
60

1  
2  
3 compared throughout the process. Data items included in the extraction may be modified following piloting.  
4  
5 At least two independent reviewers will extract data from the full text of selected studies. Extracted data will  
6  
7 be compared and conflicts between the reviewers discussed and resolved.  
8  
9

## 10 Data items

11  
12  
13  
14 The characteristics of included studies will be described based on the following:

- 15  
16 I. General categorising information (sector information, category, condition, intervention, study  
17 question)
- 18  
19 II. Country and income level (using World Bank classifications) [18]
- 20  
21 III. Population characteristics and reason for selection (age group, stratification, target criteria, number  
22 of participants)
- 23  
24 IV. Perspective of the economic evaluation (societal, government, etc.)
- 25  
26 V. Time horizon
- 27  
28 VI. Economic study type and outcome ratio
- 29  
30 VII. Comparator(s) or base case and justification for comparator
- 31  
32 VIII. Costing approach (currency, index year for costs, standardisation methods, cost components, cost  
33 sources, discount rate)
- 34  
35 IX. Outcomes (measure of benefit in evaluation, discount rate applied in outcomes)
- 36  
37 X. Sensitivity analyses (parameters, methods and results)
- 38  
39 XI. Credibility and conflicts of interest (e.g. funder)
- 40  
41 XII. Modelling (type, structure, assumptions, sources, cycle length and validation)
- 42  
43 XIII. Feasibility/necessity to contact study authors to obtain missing information  
44  
45  
46  
47  
48  
49  
50  
51  
52  
53  
54  
55  
56  
57  
58  
59  
60

1  
2  
3 XIV. Quality (subjective)  
4  
5

- 6 a. Research methods (PICO)  
7  
8  
9 b. Risk of bias – selection, performance, detection, attrition, reporting  
10  
11  
12 c. Imprecision - confidence intervals, sample size  
13  
14  
15 d. Inconsistency  
16  
17  
18 e. Publication bias  
19

20 At the full text retrieval stage reviewers will examine the economic methods used, the useability of studies  
21 containing partially age relevant data and the significance of studies that require modelling inputs. The  
22 breadth of the interventions suggests that an extensive discussion will be required to consider the value of  
23 literature where methods have not strictly complied with standard methodologies.  
24  
25  
26  
27  
28  
29

30 Risk of bias in individual studies  
31  
32

33 The quality of the selected studies will be transparently reported based on the economic evaluation  
34 methods used, validity of assumptions and possible inherent biases. Two independent reviewers will assess  
35 the certainty of evidence considering risk of bias, imprecision, inconsistency, indirectness and publication  
36 bias. Five sources of bias in reported outcomes will be assessed: selection, performance, detection, attrition  
37 and reporting. Study authors who are contactable may be requested to provide pertinent and available  
38 missing data.  
39  
40  
41  
42  
43  
44  
45  
46  
47

48 For each included study, both reviewers will assess the risk of bias and assign ratings of low, high or unclear  
49 risk of bias. Disagreement will be resolved via discussion between the two reviewers until they reach  
50 consensus or through referral to an independent third reviewer. Final decisions will be recorded in a 'Risk of  
51 bias' table with a rationale for each decision.  
52  
53  
54  
55  
56  
57  
58  
59  
60

## Data

## Synthesis

Results will be reported consistent with the PRISMA 2009 checklist; a PRISMA diagram and checklist will be included at the completion of the review.

In consideration of differing economic evaluation methodologies across sectors, a narrative synthesis of data will be undertaken. Narrative format 'Summary of Findings' (SoF) tables will present the key results of the review, including ranking of the certainty of the evidence upon which these results are based. Tables will be developed according to the outcome variable, or the means of reporting returns on investment. Information on population, intervention, comparison, setting and certainty of evidence will also be reported.

Primary comparisons will be made within sector (e.g. health sector using QALYs). Secondly, cross sectoral comparisons will be explored using willingness-to-pay thresholds to convert health outcomes to monetary units.

## Patient and public involvement

This research will be done without patient involvement. Patients were not invited to comment on the study design and were not consulted to develop patient relevant outcomes or interpret the results. Patients were not invited to contribute to the writing or editing of this document for readability or accuracy.

## Discussion

This systematic review will be the first to consider cross-sector economic evaluation of investment in early childhood. Whilst this presents some methodological challenges, the results will provide invaluable information to assist in ranking whole-of-government priorities and forming policy recommendations. The project reflects a global perspective, with national policy implications.

1  
2  
3 The lack of consistent outcome measures between sectors represents a potential limitation of the review in  
4  
5 comparing cost-effectiveness. For example, the conversion of outcomes to monetary units is contentious  
6  
7 because of the assumptions required. Furthermore, benefits of early childhood intervention may be difficult  
8  
9 to quantify because they are intangible (e.g. resilience or self-belief) or because of extrapolation methods of  
10  
11 predicting far into the future (e.g. adult employment). Moreover, while the cost effectiveness and ROI of  
12  
13 outcomes in the health, social welfare and education sectors can be measured or estimated, impacts on  
14  
15 inequality, intergenerational outcomes and benefits at a societal level may be less easily quantified. Such  
16  
17 limitations will be addressed transparently and within subgroups where necessary.  
18  
19

20  
21  
22 Summary evidence will identify gaps in the literature and provide policy makers with cross-sectoral  
23  
24 information relevant to strategic decision-making for early childhood investment.  
25  
26

## 27 28 Ethics and dissemination plan

29  
30 The findings of this review will inform policy makers and practitioners in public health, education, social  
31  
32 welfare and primary care settings. A series of academic publications is planned, focussing on overall findings  
33  
34 and subsets of data. Policy papers addressing key areas will be disseminated through Telethon Kids Institute  
35  
36 networks to policy makers and practitioners. Exemption from ethics approval was granted by the University  
37  
38 of Western Australia Human Ethics Office (RA/4/20/5677).  
39  
40  
41  
42  
43  
44  
45  
46  
47  
48  
49  
50  
51  
52  
53  
54  
55  
56  
57  
58  
59  
60

## References

1. Cunha F and J. Heckman, *The technology of skill formation*. American Economic Review, 2007. **97**: p. 31-47.
2. Rolnick, A. and R. Grunewald, *Early childhood development: Economic development with a high public return. Technical Report*. 2003.
3. Nores, M. and W.S. Barnett, *Benefits of early childhood interventions across the world: (Under) Investing in the very young*. . Economics of Education Review, 2010. **29**(2): p. 271-82.
4. Karoly, L., *The economic returns to early childhood education*. The Future of Children, 2016. **26**(2): p. 37-55.
5. Karoly, L., R. Kilburn, and J. Cannon, *Early childhood interventions proven results, future promise*. 2005, RAND Corporation,.
6. Doyle, O., et al., *Investing in early human development: Timing and economic efficiency*. Economics and Human Biology, 2009. **7**(1): p. 1-6.
7. Campbell, F., et al., *Early childhood investments substantially boost adult health*. Science, 2014. **343**(6178): p. 1478-85.
8. Hahn, R., et al., *Early childhood education to promote health equity: A community guide systematic review*. Journal of Public Health Management and Practice, 2016. **22**(5): p. E1-E8.
9. Piquero, A.R., et al., *Effects of early family/parent training programs on antisocial behavior and delinquency*. Journal of Experimental Criminology, 2009. **5**(2): p. 83-120.
10. Reynolds, A.J., et al., *Processes of Early Childhood Interventions to Adult Well-Being*. Child Development, 2017. **88**(2): p. 378-387.
11. Lee, S., S. Aos, and M. Miller, *Evidence-based programs to prevent children from entering and remaining in the child welfare system: Benefits and costs for Washington*. 2008, Washington State Institute for Public Policy: Olympia.
12. Doyle, O., et al., *Early skill formation and the efficiency of parental investment: A randomized controlled trial of home visiting*. . Labour Economics, 2017. **45**: p. 40-58.
13. Duncan, K., S. Macgillivray, and M. Renfrew, *Costs and savings of parenting interventions: Results of a systematic review*. Child: Care, Health and Development, 2017: p. 1-15.
14. Teager, W., S. Fox, and N. Stafford, *How Australia can invest early and return more: A new look at the \$15b cost and opportunity*. 2019, Early Intervention Foundation, The Front Project and CoLab at the Telethon Kids Institute,: Australia.
15. Atinc, T. and E. Gustaffson-Wright, *Early childhood development: the promise, the problem, and the path forward*. 2013, Center for Universal Education.
16. World Health Organisation, *Constitution of the World Health Organization – Basic Documents, Forty-fifth edition, Supplement 2006*, WHO.
17. *Covidence systematic review software*. Veritas Health Innovation: Melbourne, Australia.
18. World Bank. *New country classifications by income level: 2018-2019*. 2019; Available from: <https://blogs.worldbank.org/opendata/new-country-classifications-income-level-2018-2019>.



## Authors' contributions

Elizabeth Geelhoed (EG) led the conception and design of the study protocol and drafting the paper, and is the guarantor of the review.

Joelie Mandzufas (JM) contributed to the design of the study protocol and critical revision of drafts.

Phoebe George (PG) contributed to the design of the study protocol and critical revision of drafts.

Kenneth Strahan (KS) contributed to the design of the study protocol and critical revision of drafts.

Alison Duffield (AD) contributed to the design of the study protocol and critical revision of drafts.

Ian Li (IL) contributed to the conception and design of the study protocol and critical revision of drafts.

Donna Cross (DC) contributed to the conception and design of the study protocol and critical revision of drafts.

## Acknowledgements

The authors thank Jeff Borland and David Bloom for their advice.

## Funding

This work was supported by CoLab - Collaborate for Kids, a partnership between the Telethon Kids Institute and the Minderoo Foundation, made possible with funding from the Minderoo Foundation. Staff and external consultants are contracted by CoLab. Donna Cross' contribution to this paper was supported by an NHMRC Research Fellowship GNT 1119339.

The funders had no input to the design of the study or development of the protocol.

## Competing interests

None declared.

**Medline(Ovid)**

|                                                                                                                                                                                                                                                                                                                                                                                                       |
|-------------------------------------------------------------------------------------------------------------------------------------------------------------------------------------------------------------------------------------------------------------------------------------------------------------------------------------------------------------------------------------------------------|
| 1. exp Child, Preschool/                                                                                                                                                                                                                                                                                                                                                                              |
| 2. INFANT/                                                                                                                                                                                                                                                                                                                                                                                            |
| 3. early childhood.mp. [mp=title, abstract, original title, name of substance word, subject heading word, floating sub-heading word, keyword heading word, protocol supplementary concept word, rare disease supplementary concept word, unique identifier, synonyms]                                                                                                                                 |
| 4. (preschool child* or infant* or prekindergarten or kinder* or child*).mp. [mp=title, abstract, original title, name of substance word, subject heading word, floating sub-heading word, keyword heading word, protocol supplementary concept word, rare disease supplementary concept word, unique identifier, synonyms]                                                                           |
| 5. 1 or 2 or 3 or 4                                                                                                                                                                                                                                                                                                                                                                                   |
| 6. exp Cost-Benefit Analysis/                                                                                                                                                                                                                                                                                                                                                                         |
| 7. exp Quality-Adjusted Life Years/                                                                                                                                                                                                                                                                                                                                                                   |
| 8. (return on invest* or "cost and cost analysis" or economic evaluation or QALY or DALY or "quality adjusted life year*" or ROI or cost benefit*).mp. [mp=title, abstract, original title, name of substance word, subject heading word, floating sub-heading word, keyword heading word, protocol supplementary concept word, rare disease supplementary concept word, unique identifier, synonyms] |
| 9. 6 or 7 or 8                                                                                                                                                                                                                                                                                                                                                                                        |
| 10. 5 and 9                                                                                                                                                                                                                                                                                                                                                                                           |
| 11. ("cost" or "costs").tw.                                                                                                                                                                                                                                                                                                                                                                           |
| 12. 10 and 11                                                                                                                                                                                                                                                                                                                                                                                         |
| 13. limit 12 to yr="2000 -Current"                                                                                                                                                                                                                                                                                                                                                                    |
| 14. limit 13 to journal article                                                                                                                                                                                                                                                                                                                                                                       |
| 15. limit 14 to humans                                                                                                                                                                                                                                                                                                                                                                                |
| 16. limit 15 to ("all infant (birth to 23 months)" or "newborn infant (birth to 1 month)" or "infant (1 to 23 months)" or "preschool child (2 to 5 years)")                                                                                                                                                                                                                                           |

**Embase(Ovid)**

|                                                                                                                                                                                                                                                                                                                                               |
|-----------------------------------------------------------------------------------------------------------------------------------------------------------------------------------------------------------------------------------------------------------------------------------------------------------------------------------------------|
| 1. exp Child, Preschool/                                                                                                                                                                                                                                                                                                                      |
| 2. INFANT/                                                                                                                                                                                                                                                                                                                                    |
| 3. early childhood.mp. [mp=title, abstract, heading word, drug trade name, original title, device manufacturer, drug manufacturer, device trade name, keyword, floating subheading word, candidate term word]                                                                                                                                 |
| 4. (preschool child* or infant* or prekindergarten or kinder* or child*).mp. [mp=title, abstract, heading word, drug trade name, original title, device manufacturer, drug manufacturer, device trade name, keyword, floating subheading word, candidate term word]                                                                           |
| 5. 1 or 2 or 3 or 4                                                                                                                                                                                                                                                                                                                           |
| 6. exp Cost-Benefit Analysis/                                                                                                                                                                                                                                                                                                                 |
| 7. exp Quality-Adjusted Life Years/                                                                                                                                                                                                                                                                                                           |
| 8. (return on invest* or "cost and cost analysis" or economic evaluation or QALY or DALY or "quality adjusted life year*" or ROI or cost benefit*).mp. [mp=title, abstract, heading word, drug trade name, original title, device manufacturer, drug manufacturer, device trade name, keyword, floating subheading word, candidate term word] |
| 9. 6 or 7 or 8                                                                                                                                                                                                                                                                                                                                |
| 10. 5 and 9                                                                                                                                                                                                                                                                                                                                   |
| 11. ("cost" or "costs").tw.                                                                                                                                                                                                                                                                                                                   |
| 12. 10 and 11                                                                                                                                                                                                                                                                                                                                 |

|                                                            |
|------------------------------------------------------------|
| 13. limit 12 to yr="2000 -Current"                         |
| 14. limit 13 to journal                                    |
| 15. limit 14 to human                                      |
| 16. limit 15 to (infant or preschool child <1 to 6 years>) |

### Psycinfo(Ovid)

|                                                                                                                                                                                                                                                              |
|--------------------------------------------------------------------------------------------------------------------------------------------------------------------------------------------------------------------------------------------------------------|
| 1. early childhood.mp. [mp=title, abstract, heading word, table of contents, key concepts, original title, tests & measures]                                                                                                                                 |
| 2. (preschool child* or infant* or prekindergarten or kinder* or child*).mp. [mp=title, abstract, heading word, table of contents, key concepts, original title, tests & measures]                                                                           |
| 3. 1 or 2                                                                                                                                                                                                                                                    |
| 4. (return on invest* or "cost and cost analysis" or economic evaluation or QALY or DALY or "quality adjusted life year*" or ROI or cost benefit*).mp. [mp=title, abstract, heading word, table of contents, key concepts, original title, tests & measures] |
| 5. 3 and 4                                                                                                                                                                                                                                                   |
| 6. cost.mp. or costs.tw. [mp=title, abstract, heading word, table of contents, key concepts, original title, tests & measures]                                                                                                                               |
| 7. 5 and 6                                                                                                                                                                                                                                                   |
| 8. limit 7 to yr="2000 -Current"                                                                                                                                                                                                                             |
| 9. limit 8 to peer reviewed journal                                                                                                                                                                                                                          |
| 10. limit 9 to human                                                                                                                                                                                                                                         |
| 11. limit 10 to (100 childhood or 120 neonatal or 140 infancy <2 to 23 mo> or 160 preschool age)                                                                                                                                                             |

### Eric(ProQuest)

|                                                                             |
|-----------------------------------------------------------------------------|
| 1. Ab (early childhood or infant* or toddler* or child*) AND ab(cost*)      |
| 2. Filter(2000-current date)                                                |
| 3. Filter (Peer reviewed)                                                   |
| 4. Filter(scholarly journal articles)                                       |
| 5. Filter(Early Childhood Education or Kindergarten or Preschool education) |

### EconLit(EBSCO)

|    |                                                                                                                                                                                                                                                                                                                              |
|----|------------------------------------------------------------------------------------------------------------------------------------------------------------------------------------------------------------------------------------------------------------------------------------------------------------------------------|
| S8 | (AB child* OR AB ( infant or infants ) OR AB ( baby or babies ) OR AB ( preschool or kindergarten or "early childhood education" ) OR AB newborn) AND (S4 AND S7)<br><b>Expanders</b> - Apply related words<br><b>Search modes</b> - Boolean/Phrase                                                                          |
| S7 | AB child* OR AB ( infant or infants ) OR AB ( baby or babies ) OR AB ( preschool or kindergarten or "early childhood education" ) OR AB newborn<br><b>Limiters</b> - Scholarly (Peer Reviewed) Journals; Published Date: 20000101-20191231<br><b>Expanders</b> - Apply related words<br><b>Search modes</b> - Boolean/Phrase |
| S6 | AB child* OR AB ( infant or infants ) OR AB ( baby or babies ) OR AB ( preschool or kindergarten or "early childhood education" ) OR AB newborn<br><b>Limiters</b> - Scholarly (Peer Reviewed) Journals<br><b>Expanders</b> - Apply related words<br><b>Search modes</b> - Boolean/Phrase                                    |

|    |                                                                                                                                                                                                                                                                                                                                                                                                                  |
|----|------------------------------------------------------------------------------------------------------------------------------------------------------------------------------------------------------------------------------------------------------------------------------------------------------------------------------------------------------------------------------------------------------------------|
| S5 | AB child* OR AB ( infant or infants ) OR AB ( baby or babies ) OR AB ( preschool or kindergarten or "early childhood education" ) OR AB newborn<br><b>Expanders</b> - Apply related words<br><b>Search modes</b> - Boolean/Phrase                                                                                                                                                                                |
| S4 | AB ( "cost benefit analysis" or "cost-benefit analysis" or "cost effective analysis" ) OR AB ( "economic outcomes" or "economic evaluation" or "cost effectiveness" ) OR AB cost analysis OR AB economic analysis OR "cost utility"<br><b>Limiters</b> - Scholarly (Peer Reviewed) Journals; Published Date: 20000101-20191231<br><b>Expanders</b> - Apply related words<br><b>Search modes</b> - Boolean/Phrase |
| S3 | AB ( "cost benefit analysis" or "cost-benefit analysis" or "cost effective analysis" ) OR AB ( "economic outcomes" or "economic evaluation" or "cost effectiveness" ) OR AB cost analysis OR AB economic analysis OR "cost utility"<br><b>Limiters</b> - Published Date: 20000101-20191231<br><b>Expanders</b> - Apply related words<br><b>Search modes</b> - Boolean/Phrase                                     |
| S2 | AB ( "cost benefit analysis" or "cost-benefit analysis" or "cost effective analysis" ) OR AB ( "economic outcomes" or "economic evaluation" or "cost effectiveness" ) OR AB cost analysis OR AB economic analysis OR "cost utility"<br><b>Expanders</b> - Apply related words<br><b>Search modes</b> - Boolean/Phrase                                                                                            |
| S1 | AB ( "cost benefit analysis" or "cost-benefit analysis" or "cost effective analysis" ) OR AB ( "economic outcomes" or "economic evaluation" or "cost effectiveness" ) OR AB cost analysis OR AB economic analysis OR "cost utility"<br><b>Expanders</b> - Apply related words<br><b>Search modes</b> - Boolean/Phrase                                                                                            |

### PEDE(SickKids)

The PEDE database will only show less than 300 articles at a time, if more it will cause you to refine your search. Therefore for this database by limiting the years searched

|                                                                                                                                                                                                      |
|------------------------------------------------------------------------------------------------------------------------------------------------------------------------------------------------------|
| TITLE_ABSTRACT child* and TITLE_ABSTRACT cost*<br>Limiters: neonates (0-1month, infants ( 1 month to 1 year) child 1-12<br>2000-2017<br><b>1401 records, more than 300 please refine your search</b> |
| TITLE_ABSTRACT child* and TITLE_ABSTRACT cost*<br>Limiters: neonates (0-1month, infants ( 1 month to 1 year) child 1-12<br>Limited: 2000-03                                                          |
| TITLE_ABSTRACT child* and TITLE_ABSTRACT cost*<br>Limiters: neonates (0-1month, infants ( 1 month to 1 year) child 1-12<br>Limited:2004-05                                                           |
| TITLE_ABSTRACT child* and TITLE_ABSTRACT cost*<br>Limiters: neonates (0-1month, infants ( 1 month to 1 year) child 1-12<br>Limited 2006-07                                                           |
| TITLE_ABSTRACT child* and TITLE_ABSTRACT cost*<br>Limiters: neonates (0-1month, infants ( 1 month to 1 year) child 1-12<br>Limited 2007-10                                                           |
| TITLE_ABSTRACT child* and TITLE_ABSTRACT cost*<br>Limiters: neonates (0-1month, infants ( 1 month to 1 year) child 1-12<br>Limited 2010-13                                                           |
| TITLE_ABSTRACT child* and TITLE_ABSTRACT cost*                                                                                                                                                       |

|                                                                                                                                         |
|-----------------------------------------------------------------------------------------------------------------------------------------|
| Limiters: neonates (0-1month, infants ( 1 month to 1 year) child 1-12<br>Limited 2014-16                                                |
| TITLE_ABSTRACT child* and TITLE_ABSTRACT cost*<br>Limiters: neonates (0-1month, infants ( 1 month to 1 year) child 1-12<br>Limited 2017 |

For peer review only

**PRISMA-P (Preferred Reporting Items for Systematic review and Meta-Analysis Protocols) 2015 checklist: recommended items to address in a systematic review protocol\***

| Section and topic                 | Item No | Checklist item                                                                                                                                                                                                            | Information reported                |                                     | Line number(s) |
|-----------------------------------|---------|---------------------------------------------------------------------------------------------------------------------------------------------------------------------------------------------------------------------------|-------------------------------------|-------------------------------------|----------------|
|                                   |         |                                                                                                                                                                                                                           | Yes                                 | No                                  |                |
| <b>ADMINISTRATIVE INFORMATION</b> |         |                                                                                                                                                                                                                           |                                     |                                     |                |
| <b>Title</b>                      |         |                                                                                                                                                                                                                           |                                     |                                     |                |
| <b>Identification</b>             | 1a      | Identify the report as a protocol of a systematic review                                                                                                                                                                  | <input checked="" type="checkbox"/> | <input type="checkbox"/>            | 4              |
| <b>Update</b>                     | 1b      | If the protocol is for an update of a previous systematic review, identify as such                                                                                                                                        | <input type="checkbox"/>            | <input checked="" type="checkbox"/> |                |
| <b>Registration</b>               | 2       | If registered, provide the name of the registry (e.g., PROSPERO) and registration number in the Abstract                                                                                                                  | <input checked="" type="checkbox"/> | <input type="checkbox"/>            | 60             |
| <b>Authors</b>                    |         |                                                                                                                                                                                                                           |                                     |                                     |                |
| <b>Contact</b>                    | 3a      | Provide name, institutional affiliation, and e-mail address of all protocol authors; provide physical mailing address of corresponding author                                                                             | <input checked="" type="checkbox"/> | <input type="checkbox"/>            | 10-30          |
| <b>Contributions</b>              | 3b      | Describe contributions of protocol authors and identify the guarantor of the review                                                                                                                                       | <input checked="" type="checkbox"/> | <input type="checkbox"/>            | 287-298        |
| <b>Amendments</b>                 | 4       | If the protocol represents an amendment of a previously completed or published protocol, identify as such and list changes; otherwise, state plan for documenting important protocol amendments                           | <input type="checkbox"/>            | <input checked="" type="checkbox"/> |                |
| <b>Support</b>                    |         |                                                                                                                                                                                                                           |                                     |                                     |                |
| <b>Sources</b>                    | 5a      | Indicate sources of financial or other support for the review                                                                                                                                                             | <input checked="" type="checkbox"/> | <input type="checkbox"/>            | 299-302        |
| <b>Sponsor</b>                    | 5b      | Provide name for the review funder and/or sponsor                                                                                                                                                                         | <input checked="" type="checkbox"/> | <input type="checkbox"/>            | 300-302        |
| <b>Role of sponsor/funder</b>     | 5c      | Describe roles of funder(s), sponsor(s), and/or institution(s), if any, in developing the protocol                                                                                                                        | <input checked="" type="checkbox"/> | <input type="checkbox"/>            | 303            |
| <b>INTRODUCTION</b>               |         |                                                                                                                                                                                                                           |                                     |                                     |                |
| <b>Rationale</b>                  | 6       | Describe the rationale for the review in the context of what is already known                                                                                                                                             | <input checked="" type="checkbox"/> | <input type="checkbox"/>            | 72-103         |
| <b>Objectives</b>                 | 7       | Provide an explicit statement of the question(s) the review will address with reference to participants, interventions, comparators, and outcomes (PICO)                                                                  | <input checked="" type="checkbox"/> | <input type="checkbox"/>            | 104-105        |
| <b>METHODS</b>                    |         |                                                                                                                                                                                                                           |                                     |                                     |                |
| <b>Eligibility criteria</b>       | 8       | Specify the study characteristics (e.g., PICO, study design, setting, time frame) and report characteristics (e.g., years considered, language, publication status) to be used as criteria for eligibility for the review | <input checked="" type="checkbox"/> | <input type="checkbox"/>            | 108-129        |
| <b>Information sources</b>        | 9       | Describe all intended information sources (e.g., electronic databases, contact with study authors, trial registers, or other grey literature sources) with planned dates of coverage                                      | <input checked="" type="checkbox"/> | <input type="checkbox"/>            | 131-138        |
| <b>Search strategy</b>            | 10      | Present draft of search strategy to be used for at least one electronic database, including planned limits, such that it could be repeated                                                                                | <input checked="" type="checkbox"/> | <input type="checkbox"/>            | 139-152        |
| <b>STUDY RECORDS</b>              |         |                                                                                                                                                                                                                           |                                     |                                     |                |

|    |                                           |     |                                                                                                                                                                                                                                             |                                     |                                     |         |
|----|-------------------------------------------|-----|---------------------------------------------------------------------------------------------------------------------------------------------------------------------------------------------------------------------------------------------|-------------------------------------|-------------------------------------|---------|
| 1  |                                           |     |                                                                                                                                                                                                                                             |                                     |                                     |         |
| 2  | <b>Data management</b>                    | 11a | Describe the mechanism(s) that will be used to manage records and data throughout the review                                                                                                                                                | <input checked="" type="checkbox"/> | <input type="checkbox"/>            | 153-156 |
| 3  |                                           |     |                                                                                                                                                                                                                                             |                                     |                                     |         |
| 4  | <b>Selection process</b>                  | 11b | State the process that will be used for selecting studies (e.g., two independent reviewers) through each phase of the review (i.e., screening, eligibility, and inclusion in meta-analysis)                                                 | <input checked="" type="checkbox"/> | <input type="checkbox"/>            | 157-168 |
| 5  |                                           |     |                                                                                                                                                                                                                                             |                                     |                                     |         |
| 6  | <b>Data collection process</b>            | 11c | Describe planned method of extracting data from reports (e.g., piloting forms, done independently, in duplicate), any processes for obtaining and confirming data from investigators                                                        | <input checked="" type="checkbox"/> | <input type="checkbox"/>            | 169-174 |
| 7  |                                           |     |                                                                                                                                                                                                                                             |                                     |                                     |         |
| 8  | <b>Data items</b>                         | 12  | List and define all variables for which data will be sought (e.g., PICO items, funding sources), any pre-planned data assumptions and simplifications                                                                                       | <input checked="" type="checkbox"/> | <input type="checkbox"/>            | 175-200 |
| 9  |                                           |     |                                                                                                                                                                                                                                             |                                     |                                     |         |
| 10 | <b>Outcomes and prioritization</b>        | 13  | List and define all outcomes for which data will be sought, including prioritization of main and additional outcomes, with rationale                                                                                                        | <input checked="" type="checkbox"/> | <input type="checkbox"/>            | 175-200 |
| 11 |                                           |     |                                                                                                                                                                                                                                             |                                     |                                     |         |
| 12 | <b>Risk of bias in individual studies</b> | 14  | Describe anticipated methods for assessing risk of bias of individual studies, including whether this will be done at the outcome or study level, or both; state how this information will be used in data synthesis                        | <input checked="" type="checkbox"/> | <input type="checkbox"/>            | 201-211 |
| 13 |                                           |     |                                                                                                                                                                                                                                             |                                     |                                     |         |
| 14 |                                           |     |                                                                                                                                                                                                                                             |                                     |                                     |         |
| 15 | <b>DATA</b>                               |     |                                                                                                                                                                                                                                             |                                     |                                     |         |
| 16 | <b>Synthesis</b>                          | 15a | Describe criteria under which study data will be quantitatively synthesized                                                                                                                                                                 | <input checked="" type="checkbox"/> | <input type="checkbox"/>            | 222-224 |
| 17 |                                           | 15b | If data are appropriate for quantitative synthesis, describe planned summary measures, methods of handling data, and methods of combining data from studies, including any planned exploration of consistency (e.g., $I^2$ , Kendall's tau) | <input type="checkbox"/>            | <input checked="" type="checkbox"/> |         |
| 18 |                                           |     |                                                                                                                                                                                                                                             |                                     |                                     |         |
| 19 |                                           | 15c | Describe any proposed additional analyses (e.g., sensitivity or subgroup analyses, meta-regression)                                                                                                                                         | <input type="checkbox"/>            | <input checked="" type="checkbox"/> |         |
| 20 |                                           |     |                                                                                                                                                                                                                                             |                                     |                                     |         |
| 21 |                                           | 15d | If quantitative synthesis is not appropriate, describe the type of summary planned                                                                                                                                                          | <input checked="" type="checkbox"/> | <input type="checkbox"/>            | 217-224 |
| 22 |                                           |     |                                                                                                                                                                                                                                             |                                     |                                     |         |
| 23 | <b>Meta-bias(es)</b>                      | 16  | Specify any planned assessment of meta-bias(es) (e.g., publication bias across studies, selective reporting within studies)                                                                                                                 | <input checked="" type="checkbox"/> | <input type="checkbox"/>            | 217-219 |
| 24 |                                           |     |                                                                                                                                                                                                                                             |                                     |                                     |         |
| 25 | <b>Confidence in cumulative evidence</b>  | 17  | Describe how the strength of the body of evidence will be assessed (e.g., GRADE)                                                                                                                                                            | <input checked="" type="checkbox"/> | <input type="checkbox"/>            | 217-219 |
| 26 |                                           |     |                                                                                                                                                                                                                                             |                                     |                                     |         |
| 27 |                                           |     |                                                                                                                                                                                                                                             |                                     |                                     |         |
| 28 |                                           |     |                                                                                                                                                                                                                                             |                                     |                                     |         |
| 29 |                                           |     |                                                                                                                                                                                                                                             |                                     |                                     |         |
| 30 |                                           |     |                                                                                                                                                                                                                                             |                                     |                                     |         |
| 31 |                                           |     |                                                                                                                                                                                                                                             |                                     |                                     |         |
| 32 |                                           |     |                                                                                                                                                                                                                                             |                                     |                                     |         |
| 33 |                                           |     |                                                                                                                                                                                                                                             |                                     |                                     |         |
| 34 |                                           |     |                                                                                                                                                                                                                                             |                                     |                                     |         |
| 35 |                                           |     |                                                                                                                                                                                                                                             |                                     |                                     |         |
| 36 |                                           |     |                                                                                                                                                                                                                                             |                                     |                                     |         |
| 37 |                                           |     |                                                                                                                                                                                                                                             |                                     |                                     |         |
| 38 |                                           |     |                                                                                                                                                                                                                                             |                                     |                                     |         |
| 39 |                                           |     |                                                                                                                                                                                                                                             |                                     |                                     |         |
| 40 |                                           |     |                                                                                                                                                                                                                                             |                                     |                                     |         |
| 41 |                                           |     |                                                                                                                                                                                                                                             |                                     |                                     |         |
| 42 |                                           |     |                                                                                                                                                                                                                                             |                                     |                                     |         |
| 43 |                                           |     |                                                                                                                                                                                                                                             |                                     |                                     |         |
| 44 |                                           |     |                                                                                                                                                                                                                                             |                                     |                                     |         |
| 45 |                                           |     |                                                                                                                                                                                                                                             |                                     |                                     |         |
| 46 |                                           |     |                                                                                                                                                                                                                                             |                                     |                                     |         |
