# Supplementary material for: Long-term economic outcomes for interventions in early childhood: protocol for a systematic review
Source: PubMed Central journal article supplement — BMJ Open. 2020 Aug 11;10(8):e036647. doi: 10.1136/bmjopen-2019-036647 (PMC7418662; doi:10.1136/bmjopen-2019-036647), 2020-08-11
Supplement: bmjopen-2019-036647supp001.pdf [file bmjopen-2019-036647supp001.pdf]

**Medline(Ovid)**

|                                                                                                                                                                                                                                                                                                                                                                                                       |
|-------------------------------------------------------------------------------------------------------------------------------------------------------------------------------------------------------------------------------------------------------------------------------------------------------------------------------------------------------------------------------------------------------|
| 1. exp Child, Preschool/                                                                                                                                                                                                                                                                                                                                                                              |
| 2. INFANT/                                                                                                                                                                                                                                                                                                                                                                                            |
| 3. early childhood.mp. [mp=title, abstract, original title, name of substance word, subject heading word, floating sub-heading word, keyword heading word, protocol supplementary concept word, rare disease supplementary concept word, unique identifier, synonyms]                                                                                                                                 |
| 4. (preschool child* or infant* or prekindergarten or kinder* or child*).mp. [mp=title, abstract, original title, name of substance word, subject heading word, floating sub-heading word, keyword heading word, protocol supplementary concept word, rare disease supplementary concept word, unique identifier, synonyms]                                                                           |
| 5. 1 or 2 or 3 or 4                                                                                                                                                                                                                                                                                                                                                                                   |
| 6. exp Cost-Benefit Analysis/                                                                                                                                                                                                                                                                                                                                                                         |
| 7. exp Quality-Adjusted Life Years/                                                                                                                                                                                                                                                                                                                                                                   |
| 8. (return on invest* or "cost and cost analysis" or economic evaluation or QALY or DALY or "quality adjusted life year*" or ROI or cost benefit*).mp. [mp=title, abstract, original title, name of substance word, subject heading word, floating sub-heading word, keyword heading word, protocol supplementary concept word, rare disease supplementary concept word, unique identifier, synonyms] |
| 9. 6 or 7 or 8                                                                                                                                                                                                                                                                                                                                                                                        |
| 10. 5 and 9                                                                                                                                                                                                                                                                                                                                                                                           |
| 11. ("cost" or "costs").tw.                                                                                                                                                                                                                                                                                                                                                                           |
| 12. 10 and 11                                                                                                                                                                                                                                                                                                                                                                                         |
| 13. limit 12 to yr="2000 -Current"                                                                                                                                                                                                                                                                                                                                                                    |
| 14. limit 13 to journal article                                                                                                                                                                                                                                                                                                                                                                       |
| 15. limit 14 to humans                                                                                                                                                                                                                                                                                                                                                                                |
| 16. limit 15 to ("all infant (birth to 23 months)" or "newborn infant (birth to 1 month)" or "infant (1 to 23 months)" or "preschool child (2 to 5 years)")                                                                                                                                                                                                                                           |

**Embase(Ovid)**

|                                                                                                                                                                                                                                                                                                                                               |
|-----------------------------------------------------------------------------------------------------------------------------------------------------------------------------------------------------------------------------------------------------------------------------------------------------------------------------------------------|
| 1. exp Child, Preschool/                                                                                                                                                                                                                                                                                                                      |
| 2. INFANT/                                                                                                                                                                                                                                                                                                                                    |
| 3. early childhood.mp. [mp=title, abstract, heading word, drug trade name, original title, device manufacturer, drug manufacturer, device trade name, keyword, floating subheading word, candidate term word]                                                                                                                                 |
| 4. (preschool child* or infant* or prekindergarten or kinder* or child*).mp. [mp=title, abstract, heading word, drug trade name, original title, device manufacturer, drug manufacturer, device trade name, keyword, floating subheading word, candidate term word]                                                                           |
| 5. 1 or 2 or 3 or 4                                                                                                                                                                                                                                                                                                                           |
| 6. exp Cost-Benefit Analysis/                                                                                                                                                                                                                                                                                                                 |
| 7. exp Quality-Adjusted Life Years/                                                                                                                                                                                                                                                                                                           |
| 8. (return on invest* or "cost and cost analysis" or economic evaluation or QALY or DALY or "quality adjusted life year*" or ROI or cost benefit*).mp. [mp=title, abstract, heading word, drug trade name, original title, device manufacturer, drug manufacturer, device trade name, keyword, floating subheading word, candidate term word] |
| 9. 6 or 7 or 8                                                                                                                                                                                                                                                                                                                                |
| 10. 5 and 9                                                                                                                                                                                                                                                                                                                                   |
| 11. ("cost" or "costs").tw.                                                                                                                                                                                                                                                                                                                   |
| 12. 10 and 11                                                                                                                                                                                                                                                                                                                                 |

|                                                            |
|------------------------------------------------------------|
| 13. limit 12 to yr="2000 -Current"                         |
| 14. limit 13 to journal                                    |
| 15. limit 14 to human                                      |
| 16. limit 15 to (infant or preschool child <1 to 6 years>) |

**Psycinfo(Ovid)**

|                                                                                                                                                                                                                                                              |
|--------------------------------------------------------------------------------------------------------------------------------------------------------------------------------------------------------------------------------------------------------------|
| 1. early childhood.mp. [mp=title, abstract, heading word, table of contents, key concepts, original title, tests & measures]                                                                                                                                 |
| 2. (preschool child* or infant* or prekindergarten or kinder* or child*).mp. [mp=title, abstract, heading word, table of contents, key concepts, original title, tests & measures]                                                                           |
| 3. 1 or 2                                                                                                                                                                                                                                                    |
| 4. (return on invest* or "cost and cost analysis" or economic evaluation or QALY or DALY or "quality adjusted life year*" or ROI or cost benefit*).mp. [mp=title, abstract, heading word, table of contents, key concepts, original title, tests & measures] |
| 5. 3 and 4                                                                                                                                                                                                                                                   |
| 6. cost.mp. or costs.tw. [mp=title, abstract, heading word, table of contents, key concepts, original title, tests & measures]                                                                                                                               |
| 7. 5 and 6                                                                                                                                                                                                                                                   |
| 8. limit 7 to yr="2000 -Current"                                                                                                                                                                                                                             |
| 9. limit 8 to peer reviewed journal                                                                                                                                                                                                                          |
| 10. limit 9 to human                                                                                                                                                                                                                                         |
| 11. limit 10 to (100 childhood or 120 neonatal or 140 infancy <2 to 23 mo> or 160 preschool age)                                                                                                                                                             |

**Eric(ProQuest)**

|                                                                             |
|-----------------------------------------------------------------------------|
| 1. Ab (early childhood or infant* or toddler* or child*) AND ab(cost*)      |
| 2. Filter(2000-current date)                                                |
| 3. Filter (Peer reviewed)                                                   |
| 4. Filter(scholarly journal articles)                                       |
| 5. Filter(Early Childhood Education or Kindergarten or Preschool education) |

**EconLit(EBSCO)**

|    |                                                                                                                                                                                                                                                                                                                              |
|----|------------------------------------------------------------------------------------------------------------------------------------------------------------------------------------------------------------------------------------------------------------------------------------------------------------------------------|
| S8 | (AB child* OR AB ( infant or infants ) OR AB ( baby or babies ) OR AB ( preschool or kindergarten or "early childhood education" ) OR AB newborn) AND (S4 AND S7)<br><b>Expanders</b> - Apply related words<br><b>Search modes</b> - Boolean/Phrase                                                                          |
| S7 | AB child* OR AB ( infant or infants ) OR AB ( baby or babies ) OR AB ( preschool or kindergarten or "early childhood education" ) OR AB newborn<br><b>Limiters</b> - Scholarly (Peer Reviewed) Journals; Published Date: 20000101-20191231<br><b>Expanders</b> - Apply related words<br><b>Search modes</b> - Boolean/Phrase |
| S6 | AB child* OR AB ( infant or infants ) OR AB ( baby or babies ) OR AB ( preschool or kindergarten or "early childhood education" ) OR AB newborn<br><b>Limiters</b> - Scholarly (Peer Reviewed) Journals<br><b>Expanders</b> - Apply related words<br><b>Search modes</b> - Boolean/Phrase                                    |

|    |                                                                                                                                                                                                                                                                                                                                                                                                                  |
|----|------------------------------------------------------------------------------------------------------------------------------------------------------------------------------------------------------------------------------------------------------------------------------------------------------------------------------------------------------------------------------------------------------------------|
| S5 | AB child* OR AB ( infant or infants ) OR AB ( baby or babies ) OR AB ( preschool or kindergarten or "early childhood education" ) OR AB newborn<br><b>Expanders</b> - Apply related words<br><b>Search modes</b> - Boolean/Phrase                                                                                                                                                                                |
| S4 | AB ( "cost benefit analysis" or "cost-benefit analysis" or "cost effective analysis" ) OR AB ( "economic outcomes" or "economic evaluation" or "cost effectiveness" ) OR AB cost analysis OR AB economic analysis OR "cost utility"<br><b>Limiters</b> - Scholarly (Peer Reviewed) Journals; Published Date: 20000101-20191231<br><b>Expanders</b> - Apply related words<br><b>Search modes</b> - Boolean/Phrase |
| S3 | AB ( "cost benefit analysis" or "cost-benefit analysis" or "cost effective analysis" ) OR AB ( "economic outcomes" or "economic evaluation" or "cost effectiveness" ) OR AB cost analysis OR AB economic analysis OR "cost utility"<br><b>Limiters</b> - Published Date: 20000101-20191231<br><b>Expanders</b> - Apply related words<br><b>Search modes</b> - Boolean/Phrase                                     |
| S2 | AB ( "cost benefit analysis" or "cost-benefit analysis" or "cost effective analysis" ) OR AB ( "economic outcomes" or "economic evaluation" or "cost effectiveness" ) OR AB cost analysis OR AB economic analysis OR "cost utility"<br><b>Expanders</b> - Apply related words<br><b>Search modes</b> - Boolean/Phrase                                                                                            |
| S1 | AB ( "cost benefit analysis" or "cost-benefit analysis" or "cost effective analysis" ) OR AB ( "economic outcomes" or "economic evaluation" or "cost effectiveness" ) OR AB cost analysis OR AB economic analysis OR "cost utility"<br><b>Expanders</b> - Apply related words<br><b>Search modes</b> - Boolean/Phrase                                                                                            |

**PEDE(SickKids)**

The PEDE database will only show less than 300 articles at a time, if more it will cause you to refine your search. Therefore for this database by limiting the years searched

|                                                                                                                                                                                                      |
|------------------------------------------------------------------------------------------------------------------------------------------------------------------------------------------------------|
| TITLE_ABSTRACT child* and TITLE_ABSTRACT cost*<br>Limiters: neonates (0-1month, infants ( 1 month to 1 year) child 1-12<br>2000-2017<br><b>1401 records, more than 300 please refine your search</b> |
| TITLE_ABSTRACT child* and TITLE_ABSTRACT cost*<br>Limiters: neonates (0-1month, infants ( 1 month to 1 year) child 1-12<br>Limited: 2000-03                                                          |
| TITLE_ABSTRACT child* and TITLE_ABSTRACT cost*<br>Limiters: neonates (0-1month, infants ( 1 month to 1 year) child 1-12<br>Limited:2004-05                                                           |
| TITLE_ABSTRACT child* and TITLE_ABSTRACT cost*<br>Limiters: neonates (0-1month, infants ( 1 month to 1 year) child 1-12<br>Limited 2006-07                                                           |
| TITLE_ABSTRACT child* and TITLE_ABSTRACT cost*<br>Limiters: neonates (0-1month, infants ( 1 month to 1 year) child 1-12<br>Limited 2007-10                                                           |
| TITLE_ABSTRACT child* and TITLE_ABSTRACT cost*<br>Limiters: neonates (0-1month, infants ( 1 month to 1 year) child 1-12<br>Limited 2010-13                                                           |
| TITLE_ABSTRACT child* and TITLE_ABSTRACT cost*                                                                                                                                                       |

|                                                                                          |
|------------------------------------------------------------------------------------------|
| Limiters: neonates (0-1month, infants ( 1 month to 1 year) child 1-12<br>Limited 2014-16 |
|------------------------------------------------------------------------------------------|

|                                                |
|------------------------------------------------|
| TITLE_ABSTRACT child* and TITLE_ABSTRACT cost* |
|------------------------------------------------|

|                                                                                       |
|---------------------------------------------------------------------------------------|
| Limiters: neonates (0-1month, infants ( 1 month to 1 year) child 1-12<br>Limited 2017 |
|---------------------------------------------------------------------------------------|
